# Supplementary material for: Improving the peer-review process and editorial quality: key errors escaping the review and editorial process in top scientific journals
Source: PeerJ. 2016 Feb 9;4:e1670. doi: 10.7717/peerj.1670 (PMC4756748; doi:10.7717/peerj.1670)
Supplement: Data S1 [file peerj-04-1670-s001.xlsx]

## Sheet: Hoja1
	Journal	Type	Classification type	Year	Days	Mistake classification	Site in which appear the mistake	Site in which appear the mistake	Site in which appear the mistake
1	Nature	Letters	letter	1993	98	2	clarification
2	Nature	News	News	1993	28
3	Nature	Book Reviews	varis	1993	49
4	Nature	Letters	letter	1993	84	2	figure
5	Nature	Letters	letter	1993	119	2	Code
6	Nature	Articles	Article	1993	371	2	Table	figure	reference
7	Nature	Letters	letter	1993	140	2	figure
8	Nature	Articles	Article	1993	182	2	figure
9	Nature	News & Views	News	1993	84
10	Nature	Letters	letter	1993	679	3	clarification
11	Nature	Letters	letter	1993	182	2	result
12	Nature	Letters	letter	1993	63	2	figure
13	Nature	Letters	letter	1993	140	2	figure
14	Nature	Letters	letter	1993	329	2	Figure
15	Nature	Articles	Article	1993	161	2	clarification
16	Nature	Letters	letter	1993	462	3	Result
17	Nature	Letters	letter	1993	252	2	figure
18	Nature	Articles	Article	1993	14	3	figure
19	Nature	Letters	letter	1993	112	2	figure
20	Nature	News	News	1993	21
21	Nature	Letters	letter	1993	105	2	figure
22	Nature	Letters	letter	1993	210	2	figure
23	Nature	Letters	letter	1993	63	3	figure
24	Nature	Letters	letter	1993	42	2	clarification
25	Nature	News & Views	News	1993	7
26	Nature	Scientific Correspondence	varis	1993	21
27	Nature	Letters	letter	1993	77	2	figure
28	Nature	Letters	letter	1993	70	2	clarification
29	Nature	Correspondence	varis	1993	21
30	Nature	Letters	letter	1993	532	2	figure
1	Nature	Letters	letter	1994	28	2	figure
2	Nature	Letters	letter	1994	56	1	Acknowledgements
3	Nature	Letters	letter	1994	105	2	Word
4	Nature	Letters	letter	1994	49	1	Acknowledgements
5	Nature	Letters	letter	1994	93	2	references
6	Nature	Letters	letter	1994	56	2	figure
7	Nature	Letters	letter	1994	1638	2	figure
8	Nature	News	News	1994	35
9	Nature	Letters	letter	1994	28	2	figure
10	Nature	Letters	letter	1994	14	1	title
11	Nature	Letters	letter	1994	35	2	clarification
12	Nature	Correspondence	varis	1994	126
13	Nature	Letters	letter	1994	749	3	clarification
14	Nature	Letters	letter	1994	518	3	clarification
15	Nature	Letters	letter	1994	70	2	figure
16	Nature	Letters	letter	1994	329	3	clarification
17	Nature	Letters	letter	1994	70	3	figure
18	Nature	Letters	letter	1994	56	1	Acknowledgements
19	Nature	Letters	letter	1994	49	2	Word
20	Nature	Letters	letter	1994	154	2	reference
21	Nature	Progress	varis	1994	35
22	Nature	Letters	letter	1994	98	2	figure
23	Nature	News & Views	News	1994	28
24	Nature	Letters	letter	1994	49	2	figure
25	Nature	News	News	1994	42
26	Nature	Letters	letter	1994	355	2	reference
27	Nature	Letters	letter	1994	546	3	clarification
28	Nature	Letters	letter	1994	7
29	Nature	Letters	letter	1994	14
30	Nature	Review	Review	1994	35	3	figure
1	Nature	Letters	letter	1995	49	1	author
2	Nature	Correspondence	varis	1995	21
3	Nature	Articles	Article	1995	224	3	clarification
4	Nature	Letters	letter	1995	91	2	figure
5	Nature	Articles	Article	1995	35	2	figure
6	Nature	Letters	letter	1995	140	3	clarification
7	Nature	Letters	letter	1995	42	2	figure
8	Nature	Letters	letter	1995	63	2	figure
9	Nature	Letters	letter	1995	126	3	figure	table
10	Nature	Letters	letter	1995	672	3	clarification
11	Nature	Letters	letter	1995	91	3	figure
12	Nature	Letters	letter	1995	21	2	figure
13	Nature	Letters	letter	1995	70	2	figure
14	Nature	Letters	letter	1995	1071	2	clarification
15	Nature	Letters	letter	1995	84	2	reference
16	Nature	News & Views	News	1995	42
17	Nature	Letters	letter	1995	91	2	figure
18	Nature	Letters	letter	1995	28	2	figure
19	Nature	Letters	letter	1995	763
20	Nature	Review	Review	1995	119	2	figure
21	Nature	Letters	letter	1995	147	2	Table
22	Nature	Letters	letter	1995	266	2	reference
23	Nature	Letters	letter	1995	56	1	figure
24	Nature	Letters	letter	1995	119	2	figure
25	Nature	Autumn Books	varis	1995	28
26	Nature	Bok Reviews	varis	1995	7
27	Nature	Letters	letter	1995	14	2	figure
28	Nature	Letters	letter	1995	63	2	figure
29	Nature	Letters	letter	1995	49	2	figure
30	Nature	Letters	letter	1995	21	1	author
1	Nature	Letters	letter	1996	56	1	Typo
2	Nature	Letters	letter	1996	49	1	author
3	Nature	Letters	letter	1996	91	2	figure
4	Nature	Letters	letter	1996	42	2	figure
5	Nature	News & Views	News	1996	14
6	Nature	Scientific Correspondence	varis	1996	14
7	Nature	Correspondence	varis	1996	28
8	Nature	News & Views	News	1996	7
9	Nature	Articles	Article	1996	77	2	clarification
10	Nature	Letters	letter	1996	126	1	Date
11	Nature	Letters	letter	1996	77	3	figure
12	Nature	Letters	letter	1996	49	1	table
13	Nature	Articles	Article	1996	35	1	author
14	Nature	Scientific Correspondence	varis	1996	56
15	Nature	Letters	letter	1996	1176	3	Result
16	Nature	Letters	letter	1996	140	2	Methods
17	Nature	Letters	letter	1996	49	2	Figure
18	Nature	Scientific Correspondence	varis	1996	63
19	Nature	Letters	letter	1996	49	1	author
20	Nature	Letters	letter	1996	266	2	clarification
21	Nature	Letters	letter	1996	105	2	Cover
22	Nature	Scientific Correspondence	varis	1996	70
23	Nature	Letters	letter	1996	84	2	figure
24	Nature	Letters	letter	1996	91	1	title
25	Nature	Letters	letter	1996	63	2	figure
26	Nature	Letters	letter	1996	210	2	figure
27	Nature	Scientific Correspondence	varis	1996	35
28	Nature	Letters	letter	1996	35	2	figure
29	Nature	Letters	letter	1996	91	2	Figure
30	Nature	Articles	Article	1996	56	2	figure
1	Nature	Article	Article	1997	#REF!	3	Result
2	Nature	Letter	letter	1997	#REF!	3	Result
3	Nature	Letter	letter	1997	#REF!	3	figure
4	Nature	Scientific Correspondence	varis	1997	#REF!
5	Nature	Letter	letter	1997	#REF!	3	Result
6	Nature	Article	Article	1997	#REF!	2	figure
7	Nature	Letter	letter	1997	#REF!	2	Reference
8	Nature	News & Views	News	1997	#REF!
9	Nature	Letter	letter	1997	#REF!	2	figure
10	Nature	News	News	1997	#REF!
11	Nature	Article	Article	1997	#REF!	3	Result
12	Nature	Letter	letter	1997	#REF!	2	Reference
13	Nature	Letter	letter	1997	#REF!	1	Typo
14	Nature	Letter	letter	1997	#REF!	1	figure
15	Nature	Letter	letter	1997	#REF!	3	Result
16	Nature	Letter	letter	1997	#REF!	2	figure
17	Nature	Letter	letter	1997	#REF!	3	Result
18	Nature	Letter	letter	1997	#REF!	2	reference
19	Nature	Article	Article	1997	#REF!	3	Equation
20	Nature	Letter	letter	1997	#REF!	1	Typo
21	Nature	Article	Article	1997	#REF!	2	clarification
22	Nature	Letter	letter	1997	#REF!	2	Result
23	Nature	Letter	letter	1997	#REF!	2	Reference
24	Nature	Letter	letter	1997	#REF!	3	Result
25	Nature	News & Views	News	1997	#REF!
26	Nature	Scientific Correspondence	varis	1997	#REF!
27	Nature	Letter	letter	1997	#REF!	3	Code
28	Nature	Letter	letter	1997	#REF!	2	Reference
29	Nature	Letter	letter	1997	#REF!	2	clarification
30	Nature	Letter	letter	1997	#REF!	3	Result
1	Nature	Letter	letter	1998	#REF!	2	figure
2	Nature	Scientific Correspondence	varis	1998	#REF!
3	Nature	Letter	letter	1998	#REF!	3	Result
4	Nature	Article	Article	1998	#REF!	2	Code
5	Nature	Letter	letter	1998	#REF!	1	author
6	Nature	Letter	letter	1998	#REF!	3	Result
7	Nature	Article	Article	1998	#REF!	3	Result Figure
8	Nature	News & Views	News	1998	#REF!
9	Nature	News & Views	News	1998	#REF!
10	Nature	Letter	letter	1998	#REF!	2	Code
11	Nature	Letter	letter	1998	#REF!	3	Result
12	Nature	Letter	letter	1998	#REF!	1	figure
13	Nature	Letter	letter	1998	#REF!	3	figure
14	Nature	Letter	letter	1998	#REF!	2	figure
15	Nature	Book reviews	varis	1998	#REF!
16	Nature	Letter	letter	1998	#REF!	3	Result
17	Nature	Letter	letter	1998	#REF!	1	author
18	Nature	Letter	letter	1998	#REF!	2	figure
19	Nature	Letter	letter	1998	#REF!	2	sentence
20	Nature	Letter	letter	1998	#REF!	2	Result
21	Nature	Letter	letter	1998	#REF!	2	figure
22	Nature	Letter	letter	1998	#REF!	2	figure
23	Nature	Article	Article	1998	#REF!	2	Table
24	Nature	Letter	letter	1998	#REF!	1	typo
25	Nature	Letter	letter	1998	#REF!	3	Result
26	Nature	Article	Article	1998	#REF!	2	figure
27	Nature	News & Views	News	1998	#REF!
28	Nature	Letter	letter	1998	#REF!	3	figure
29	Nature	Science and Image	varis	1998	#REF!
30	Nature	Letter	letter	1998	#REF!	2	Coordenates
1	Nature	Scientific Correspondence	varis	1999	#REF!
2	Nature	Scientific Correspondence	varis	1999	#REF!
3	Nature	Letter	letter	1999	#REF!	2	figure
4	Nature	Letter	letter	1999	#REF!	3	figure
5	Nature	Letter	letter	1999	#REF!	3	figure
6	Nature	Letter	letter	1999	#REF!	2	Cover
7	Nature	Letter	letter	1999	#REF!	3	figure	table
8	Nature	News & Views	News	1999	#REF!
9	Nature	Letter	letter	1999	#REF!	2	Title	code
10	Nature	Letter	letter	1999	#REF!	2	Code
11	Nature	Article	Article	1999	#REF!	2	Code
12	Nature	News & Views	News	1999	#REF!
13	Nature	News & Views	News	1999	#REF!
14	Nature	Letter	letter	1999	#REF!	2	figure
15	Nature	Letter	letter	1999	#REF!	2	figure
16	Nature	Letter	letter	1999	#REF!	1	Word
17	Nature	Letter	letter	1999	#REF!	2	figure
18	Nature	Letter	letter	1999	#REF!	2	figure
19	Nature	Letter	letter	1999	#REF!	2	figure
20	Nature	Brief Communications	varis	1999	#REF!	2	Result
21	Nature	Letter	letter	1999	#REF!	1	author
22	Nature	Letter	letter	1999	#REF!	3	figure
23	Nature	Scientific Correspondence	varis	1999	#REF!
24	Nature	Brief Communications	varis	1999	#REF!	1	author
25	Nature	Scientific Correspondence	varis	1999	#REF!
26	Nature	Scientific Correspondence	varis	1999	#REF!
27	Nature	Letter	letter	1999	#REF!	2	figure
28	Nature	Letter	letter	1999	#REF!	2	Result
29	Nature	Letter	letter	1999	#REF!	2	figure
30	Nature	Letter	letter	1999	#REF!	1	author
1	Nature	Brief Communications	varis	2000	#REF!	2	Figure
2	Nature	Brief Communications	varis	2000	#REF!	3	Result
3	Nature	News & Views	News	2000	#REF!
4	Nature	Brief Communications	varis	2000	#REF!	2	Table
5	Nature	Letter	letter	2000	#REF!	1	author
6	Nature	Letter	letter	2000	#REF!	2	Table
7	Nature	Article	Article	2000	#REF!	2	author
8	Nature	Brief Communications	varis	2000	#REF!	2	clarification
9	Nature	Letter	letter	2000	#REF!	2	Methods
10	Nature	Letter	letter	2000	#REF!	3	result
11	Nature	News & Views	News	2000	#REF!
12	Nature	News & Views	News	2000	#REF!
13	Nature	Correspondence	varis	2000	#REF!
14	Nature	Letter	letter	2000	#REF!	1	Typo
15	Nature	Letter	letter	2000	#REF!	1	figure
16	Nature	Letter	letter	2000	#REF!	2	figure
17	Nature	Letter	letter	2000	#REF!	1	figure
18	Nature	Letter	letter	2000	#REF!	2	figure
19	Nature	Letter	letter	2000	#REF!	3	figure
20	Nature	Letter	letter	2000	#REF!	2	figure
21	Nature	Brief communication	varis	2000	#REF!	1	author
22	Nature	Article	Article	2000	#REF!	1	author
23	Nature	Letter	letter	2000	#REF!	3	figure
24	Nature	Letter	letter	2000	#REF!	2	figure
25	Nature	Letter	letter	2000	#REF!	2	figure
26	Nature	Letter	letter	2000	#REF!	2	reference
27	Nature	Brief communications	varis	2000	#REF!	1	clarification
28	Nature	Letter	letter	2000	#REF!	3	figure
29	Nature	Letter	letter	2000	#REF!	2	figure
30	Nature	Letter	letter	2000	#REF!	2	Reference
1	Nature	Letter	letter	2001	#REF!	1	Acknowledgements
2	Nature	Letter	letter	2001	#REF!	2	figure
3	Nature	Letter	letter	2001	#REF!	1	figure
4	Nature	Letter	letter	2001	#REF!	2	figure
5	Nature	Brief communication	varis	2001	#REF!	2	figure
6	Nature	Letter	letter	2001	#REF!	1	author
7	Nature	News	News	2001	#REF!
8	Nature	Letter	letter	2001	#REF!	2	figure
9	Nature	Letter	letter	2001	#REF!	2	figure
10	Nature	Letter	letter	2001	#REF!	1	figure
11	Nature	Letter	letter	2001	#REF!	1	figure
12	Nature	Letter	letter	2001	#REF!	1	figure
13	Nature	Letter	letter	2001	#REF!	1	typo
14	Nature	Letter	letter	2001	#REF!	3	figure
15	Nature	Letter	letter	2001	#REF!	3	Data
16	Nature	Brief communications	varis	2001	#REF!	2	Reference	results
17	Nature	Letter	letter	2001	#REF!	2	Figure	results
18	Nature	Letter	letter	2001	#REF!	2	Result	table
19	Nature	Letter	letter	2001	#REF!	3	Result
20	Nature	Letter	letter	2001	#REF!	2	Table	results
21	Nature	Letter	letter	2001	#REF!	1	Reference
22	Nature	Letter	letter	2001	#REF!	2	Result
23	Nature	Article	Article	2001	#REF!	1	figure
24	Nature	Scientific Correspondence	varis	2001	#REF!
25	Nature	Brief communications	varis	2001	#REF!	2	Table
26	Nature	Brief communications	varis	2001	#REF!	2	Result
27	Nature	Brief communications	varis	2001	#REF!	1	figure
28	Nature	Brief communications	varis	2001	#REF!	1	author
29	Nature	Letter	letter	2001	#REF!	3	Methods
30	Nature	Letter	letter	2001	#REF!	3	figure
1	Nature	Letter	letter	2002	#REF!	2	Code
2	Nature	Letter	letter	2002	#REF!	2	Code
3	Nature	Letter	letter	2002	#REF!	1	Typo
4	Nature	Letter	letter	2002	#REF!	2	Code
5	Nature	Letter	letter	2002	#REF!	3	Result
6	Nature	Letter	letter	2002	#REF!	2	Result
7	Nature	Letter	letter	2002	#REF!	1	figure
8	Nature	Letter	letter	2002	#REF!	1	Typo
9	Nature	Letter	letter	2002	#REF!	2	figure
10	Nature	Book reviews	varis	2002	#REF!
11	Nature	Letter	letter	2002	#REF!	2	figure
12	Nature	Letter	letter	2002	#REF!	2	clarification
13	Nature	Letter	letter	2002	#REF!	2	Result	code
14	Nature	Article	Article	2002	#REF!	2	Result
15	Nature	Letter	letter	2002	#REF!	1	Conflict of interest
16	Nature	News & Views	News	2002	#REF!
17	Nature	News & Views	News	2002	#REF!
18	Nature	Brief communication	varis	2002	#REF!	2	Value
19	Nature	Letter	letter	2002	#REF!	2	Data
20	Nature	News & Views	News	2002	#REF!
21	Nature	Letter	letter	2002	#REF!	1	Volumen issue
22	Nature	Letter	letter	2002	#REF!	1	Supplementary material
23	Nature	Letter	letter	2002	#REF!	3	Data
24	Nature	Letter	letter	2002	#REF!	2	Data
25	Nature	Letter	letter	2002	#REF!	2	Code
26	Nature	Letter	letter	2002	#REF!	3	Figure and data
27	Nature	Letter	letter	2002	#REF!	2	Figure
28	Nature	Letter	letter	2002	#REF!	1	Acknowledgements
29	Nature	News & Views	News	2002	#REF!
30	Nature	Letter	letter	2002	#REF!	2	Equation
1	Nature	Letter	letter	2003	#REF!	3	Figure
2	Nature	Letter	letter	2003	#REF!	2	Figure
3	Nature	Brief Communication	varis	2003	#REF!	2	Figure
4	Nature	Letter	letter	2003	#REF!	2	Code
5	Nature	Letter	letter	2003	#REF!	3	Result
6	Nature	News Feature	News	2003	#REF!
7	Nature	Concepts	varis	2003	#REF!
8	Nature	Brief Communication	varis	2003	#REF!	3	Figure
9	Nature	Letter	letter	2003	#REF!	1	Name
10	Nature	Letter	letter	2003	#REF!	2	Figure
11	Nature	Brief Communication	varis	2003	#REF!	1	author
12	Nature	Article	Article	2003	#REF!	3	Figure
13	Nature	Letter	letter	2003	#REF!	2	Equation
14	Nature	Letter	letter	2003	#REF!	3	Figure
15	Nature	Letter	letter	2003	#REF!	1	author
16	Nature	Letter	letter	2003	#REF!	3	Data
17	Nature	Letter	letter	2003	#REF!	2	Methods
18	Nature	Brief Communication	varis	2003	#REF!	3	Data
19	Nature	News	News	2003	#REF!
20	Nature	News Feature	News	2003	#REF!
21	Nature	Article	Article	2003	#REF!	3	Equation
22	Nature	Brief Communication	varis	2003	#REF!	2	Data previous study
23	Nature	Letter	letter	2003	#REF!	2	Data previous study
24	Nature	Brief Communication	varis	2003	#REF!	2	Figure
25	Nature	Letter	letter	2003	#REF!	1	Conflict of interest
26	Nature	Letter	letter	2003	#REF!	2	Figure
27	Nature	Letter	letter	2003	#REF!	1	Acknowledgements
28	Nature	Letter	letter	2003	#REF!	3	figure	methods	data
29	Nature	Letter	letter	2003	#REF!	3	Data
30	Nature	Letter	letter	2003	#REF!	3	Data
1	Nature	Brief communication	varis	2004	#REF!	2	patent authors
2	Nature	News & Views	News	2004	#REF!
3	Nature	Insight	varis	2004	#REF!
4	Nature	Article	Article	2004	#REF!	3	Supplementary material
5	Nature	Brief communication	varis	2004	#REF!	1	Conflict of interest
6	Nature	Letter	letter	2004	#REF!	3	Data	author
7	Nature	Letter	letter	2004	#REF!	2	Figure
8	Nature	Letter	letter	2004	#REF!	1	Reference
9	Nature	Letter	letter	2004	#REF!	2	Figure
10	Nature	Letter	letter	2004	#REF!	1	reference
11	Nature	Letter	letter	2004	#REF!	2	Figure
12	Nature	Article	Article	2004	#REF!	2	Data
13	Nature	Letter	letter	2004	#REF!	2	Figure
14	Nature	Review	Review	2004	#REF!	2	Figure
15	Nature	Letter	letter	2004	#REF!	2	Figure	data
16	Nature	Letter	letter	2004	#REF!	3	Methods
17	Nature	Letter	letter	2004	#REF!	3	Data
18	Nature	Letter	letter	2004	#REF!	1	author
19	Nature	books & arts	varis	2004	#REF!
20	Nature	News & Views	News	2004	#REF!
21	Nature	Letter	letter	2004	#REF!	3	Data	figure
22	Nature	Feature	varis	2004	#REF!
23	Nature	News	News	2004	#REF!
24	Nature	Brief communication	varis	2004	#REF!	2	Figure
25	Nature	Letter	letter	2004	#REF!	1	genbank
26	Nature	Letter	letter	2004	#REF!	2	figure
27	Nature	Letter	letter	2004	#REF!	3	Result
28	Nature	books & arts	varis	2004	#REF!
29	Nature	News Feature	News	2004	#REF!
30	Nature	books & arts	varis	2004	#REF!
1	Nature	Letter	letter	2005	#REF!	1	author
2	Nature	Letter	letter	2005	#REF!	2	Figure
3	Nature	Article	Article	2005	#REF!	1	reference
4	Nature	News	News	2005	#REF!
5	Nature	Letter	letter	2005	#REF!	2	Method
6	Nature	Letter	letter	2005	#REF!	3	Data
7	Nature	Brief communication	varis	2005	#REF!	2	Supplementary material
8	Nature	Letter	letter	2005	#REF!	2	Figure
9	Nature	Letter	letter	2005	#REF!	2	figure
10	Nature	Insight	varis	2005	#REF!
11	Nature	Letter	letter	2005	#REF!	2	Figure
12	Nature	News & Views	News	2005	#REF!
13	Nature	Letter	letter	2005	#REF!	1	author
14	Nature	News story	News	2005	#REF!
15	Nature	Business	varis	2005	#REF!
16	Nature	News	News	2005	#REF!
17	Nature	News story	News	2005	#REF!
18	Nature	Editorial	Editorial	2005	#REF!
19	Nature	News & Views	News	2005	#REF!
20	Nature	Insight	varis	2005	#REF!
21	Nature	Article	Article	2005	#REF!	2	Data	figure
22	Nature	News	News	2005	#REF!
23	Nature	News & Views	News	2005	#REF!
24	Nature	Letter	letter	2005	#REF!	1	author
25	Nature	Letter	letter	2005	#REF!	1	figure
26	Nature	Letter	letter	2005	#REF!	1	author
27	Nature	Brief communication	varis	2005	#REF!	2	Data bank
28	Nature	Sidelines	varis	2005	#REF!
29	Nature	Brief communication	varis	2005	#REF!	2	Table
30	Nature	Research Highlights	Research	2005	#REF!
1	Nature	Letter	letter	2006	#REF!	1	author
2	Nature	Letter	letter	2006	#REF!	1	figure
3	Nature	Letter	letter	2006	#REF!	3	equation
4	Nature	Letter	letter	2006	#REF!	2	Suppl Table
5	Nature	News & Views	News	2006	#REF!
6	Nature	Letter	letter	2006	#REF!	1	clarification
7	Nature	Article	Article	2006	#REF!	2	Supplementary material
8	Nature	Brief Communication	varis	2006	#REF!	1	author
9	Nature	News Feature	News	2006	#REF!
10	Nature	News Feature	News	2006	#REF!
11	Nature	Letter	letter	2006	#REF!	2	figure
12	Nature	Letter	letter	2006	#REF!	3	Result Retraction?
13	Nature	Article	Article	2006	#REF!	1	author
14	Nature	News & Views	News	2006	#REF!
15	Nature	News	News	2006	#REF!
16	Nature	books & arts	varis	2006	#REF!
17	Nature	Letter	letter	2006	#REF!	3	Result	figure
18	Nature	Letter	letter	2006	#REF!	2	figure
19	Nature	Letter	letter	2006	#REF!	2	figure
20	Nature	books & arts	varis	2006	#REF!
21	Nature	Letter	letter	2006	#REF!	2	figure
22	Nature	Addendum	varis	2006	#REF!	3	clarification
23	Nature	Insight	varis	2006	#REF!
24	Nature	Article	Article	2006	#REF!	1	author
25	Nature	News & Views	News	2006	#REF!
26	Nature	Comunication	varis	2006	#REF!
27	Nature	Letter	letter	2006	#REF!	2	Word
28	Nature	Letter	letter	2006	#REF!	1	author
29	Nature	News & Views	News	2006	#REF!
30	Nature	Report	varis	2006	#REF!
1	Nature	News & Views	News	2007	#REF!
2	Nature	News Feature	News	2007	#REF!
3	Nature	Correspondence	varis	2007	#REF!
4	Nature	News & Views	News	2007	#REF!
5	Nature	News story	News	2007	#REF!
6	Nature	News & Views	News	2007	#REF!
7	Nature	Letter	letter	2007	#REF!	2	figure
8	Nature	Letter	letter	2007	#REF!	2	equation
9	Nature	Letter	letter	2007	#REF!	2	Data
10	Nature	Article	Article	2007	#REF!	2	Value
11	Nature	News story	News	2007	#REF!
12	Nature	News story	News	2007	#REF!
13	Nature	News & Views	News	2007	#REF!
14	Nature	Article	Article	2007	#REF!	3	Result	figure
15	Nature	News & Views	News	2007	#REF!
16	Nature	Article	Article	2007	#REF!	1	DOI
17	Nature	News Feature	News	2007	#REF!
18	Nature	Essay	varis	2007	#REF!
19	Nature	News & Views	News	2007	#REF!
20	Nature	Letter	letter	2007	#REF!	2	Code
21	Nature	Graphic detail	varis	2007	#REF!
22	Nature	News story	News	2007	#REF!
23	Nature	News story	News	2007	#REF!
24	Nature	News	News	2007	#REF!
25	Nature	Article	Article	2007	#REF!	1	Reference
26	Nature	Article	Article	2007	#REF!	1	Reference
27	Nature	Technology Feature	varis	2007	#REF!
28	Nature	News & Views	News	2007	#REF!
29	Nature	News & Views	News	2007	#REF!
30	Nature	Letter	letter	2007	#REF!	2	figure
1	Nature	Article	Article	2008	#REF!	3	Retraction
2	Nature	Letter	letter	2008	#REF!	1	author
3	Nature	books & arts	varis	2008	#REF!
4	Nature	Letter	letter	2008	#REF!	1	code
5	Nature	Letter	letter	2008	#REF!	1	Code
6	Nature	Article	Article	2008	#REF!	1	figure
7	Nature	Letter	letter	2008	#REF!	1	figure
8	Nature	Letter	letter	2008	#REF!	1	figure
9	Nature	books & arts	varis	2008	#REF!
10	Nature	Letter	letter	2008	#REF!	1	Author
11	Nature	News & Views	News	2008	#REF!
12	Nature	Letter	letter	2008	#REF!	2	figure
13	Nature	News & Views	News	2008	#REF!
14	Nature	News & Views	News	2008	#REF!
15	Nature	Article	Article	2008	#REF!	1	author
16	Nature	Correspondence	varis	2008	#REF!
17	Nature	Brief Communication Arising	varis	2008	#REF!	2	Result
18	Nature	Article	Article	2008	#REF!	1	Methods	online methods unit
19	Nature	News & Views	News	2008	#REF!
20	Nature	Article	Article	2008	#REF!	2	figure
21	Nature	Article	Article	2008	#REF!	1	author
22	Nature	Letter	letter	2008	#REF!	2	Table
23	Nature	Essay	varis	2008	#REF!
24	Nature	Article	Article	2008	#REF!	1	figure
25	Nature	Letter	letter	2008	#REF!	2	Code
26	Nature	Article	Article	2008	#REF!	3	Result
27	Nature	Article	Article	2008	#REF!	1	author
28	Nature	Letter	letter	2008	#REF!	2	Reference
29	Nature	Letter	letter	2008	#REF!	1	Supplementary material
30	Nature	Comment	varis	2008	#REF!
1	Nature	Letter	letter	2009	#REF!	1	figure
2	Nature	Book Review	varis	2009	#REF!
3	Nature	Letter	letter	2009	#REF!	2	clarification
4	Nature	Letter	letter	2009	#REF!	1	author
5	Nature	Letter	letter	2009	#REF!	2	figure
6	Nature	News & Views	News	2009	#REF!
7	Nature	Letter	letter	2009	#REF!	2	figure
8	Nature	News Feature	News	2009	#REF!
9	Nature	Book Review	varis	2009	#REF!
10	Nature	Article	Article	2009	#REF!	2	figure
11	Nature	Article	Article	2009	#REF!	1	Result	author
12	Nature	Letter	letter	2009	#REF!	1	author
13	Nature	Editorial	Editorial	2009	#REF!
14	Nature	News & Views	News	2009	#REF!
15	Nature	News story	News	2009	#REF!
16	Nature	Letter	letter	2009	#REF!	1	author
17	Nature	Letter	letter	2009	#REF!	1	figure
18	Nature	Letter	letter	2009	#REF!	1	Typo
19	Nature	News Feature	News	2009	#REF!
20	Nature	News story	News	2009	#REF!
21	Nature	Naturejobs	varis	2009	#REF!
22	Nature	News Feature	News	2009	#REF!
23	Nature	Review	Review	2009	#REF!
24	Nature	Book Review	varis	2009	#REF!
25	Nature	News Feature	News	2009	#REF!
26	Nature	Letter	letter	2009	#REF!	2	figure
27	Nature	News Feature	News	2009	#REF!
28	Nature	Letter	letter	2009	#REF!	1	Typo
29	Nature	News Feature	News	2009	#REF!
30	Nature	Article	Article	2009	#REF!	2	figure
1	Nature	News story	News	2010	#REF!
2	Nature	News Feature	News	2010	#REF!
3	Nature	Letter	letter	2010	#REF!	1	author
4	Nature	Letter	letter	2010	#REF!	1	Pers comm
5	Nature	Letter	letter	2010	#REF!	2	figure
6	Nature	Outlook	varis	2010	#REF!
7	Nature	Letter	letter	2010	#REF!	3	Result
8	Nature	Technology Feature	varis	2010	#REF!
9	Nature	Letter	letter	2010	#REF!	1	figure
10	Nature	Outlook	varis	2010	#REF!
11	Nature	Letter	letter	2010	#REF!	1	author
12	Nature	Letter	letter	2010	#REF!	2	Word
13	Nature	Article	Article	2010	#REF!	1	author
14	Nature	Letter	letter	2010	#REF!	2	figure
15	Nature	News & Views	News	2010	#REF!
16	Nature	Letter	letter	2010	#REF!	1	Reference
17	Nature	Review	Review	2010	#REF!
18	Nature	Outlook	varis	2010	#REF!
19	Nature	News in Focus	News	2010	#REF!
20	Nature	News in Focus	News	2010	#REF!
21	Nature	Article	Article	2010	#REF!	3	Retraction
22	Nature	News & Views	News	2010	#REF!
23	Nature	Letter	letter	2010	#REF!	2	figure
24	Nature	Letter	letter	2010	#REF!	2	Equation
25	Nature	Letter	letter	2010	#REF!	3	Retraction
26	Nature	Article	Article	2010	#REF!	1	author
27	Nature	News Feature	News	2010	#REF!
28	Nature	News & Views	News	2010	#REF!
29	Nature	Comment	varis	2010	#REF!
30	Nature	News	News	2010	#REF!
1	Nature	News story	News	2011	#REF!
2	Nature	Book Review	varis	2011	#REF!
3	Nature	Letter	letter	2011	#REF!	2	figure
4	Nature	Letter	letter	2011	#REF!	2	figure	table
5	Nature	Letter	letter	2011	#REF!	2	Methods	equation
6	Nature	News Feature	News	2011	#REF!
7	Nature	Article	Article	2011	#REF!	1	author
8	Nature	Article	Article	2011	#REF!	2	figure
9	Nature	Letter	letter	2011	#REF!	1	author
10	Nature	Letter	letter	2011	#REF!	2	figure
11	Nature	Article	Article	2011	#REF!	2	figure
12	Nature	Letter	letter	2011	#REF!	2	clarification
13	Nature	Article	Article	2011	#REF!	2	figure
14	Nature	Letter	letter	2011	#REF!	2	figure
15	Nature	Letter	letter	2011	#REF!	2	figure
16	Nature	Letter	letter	2011	#REF!	2	figure
17	Nature	Letter	letter	2011	#REF!	2	figure
18	Nature	Letter	letter	2011	#REF!	1	dna sequence
19	Nature	News & Views	News	2011	#REF!
20	Nature	News story	News	2011	#REF!
21	Nature	News story	News	2011	#REF!
22	Nature	News Feature	News	2011	#REF!
23	Nature	Letter	letter	2011	#REF!	2	figure
24	Nature	Letter	letter	2011	#REF!	2	figure
25	Nature	Letter	letter	2011	#REF!	2	figure	figure supplementary
26	Nature	News story	News	2011	#REF!
27	Nature	News & Views	News	2011	#REF!
28	Nature	Letter	letter	2011	#REF!	1	genbank
29	Nature	News story	News	2011	#REF!
30	Nature	News Feature	News	2011	#REF!
1	Nature	Article	Article	2012	#REF!	1	Conflict of interest
2	Nature	Review	Review	2012	#REF!
3	Nature	Article	Article	2012	#REF!	2	Table	figure	reference
4	Nature	Letter	letter	2012	#REF!	1	author
5	Nature	Article	Article	2012	#REF!	1	author
6	Nature	Letter	letter	2012	#REF!	1	author
7	Nature	News Feature	News	2012	#REF!
8	Nature	Letter	letter	2012	#REF!	1	link
9	Nature	Letter	letter	2012	#REF!	1	Date
10	Nature	Letter	letter	2012	#REF!	2	figure
11	Nature	insight	varis	2012	#REF!
12	Nature	Article	Article	2012	#REF!	1	author
13	Nature	Letter	letter	2012	#REF!	1	author
14	Nature	Letter	letter	2012	#REF!	2	figure
15	Nature	Letter	letter	2012	#REF!	3	Value
16	Nature	News story	News	2012	#REF!
17	Nature	Editorial	Editorial	2012	#REF!
18	Nature	News	News	2012	#REF!
19	Nature	Letter	letter	2012	#REF!	1	figure
20	Nature	Letter	letter	2012	#REF!	1	Accession inf
21	Nature	Letter	letter	2012	#REF!	2	figure	table
22	Nature	Article	Article	2012	#REF!	1	author
23	Nature	News	News	2012	#REF!
24	Nature	Brief Communication Arising	varis	2012	#REF!	2	Fig
25	Nature	Letter	letter	2012	#REF!	2	Figure	figure supplementary
26	Nature	News story	News	2012	#REF!
27	Nature	News story	News	2012	#REF!
28	Nature	World View	varis	2012	#REF!
29	Nature	Correspondence	varis	2012	#REF!
30	Nature	News story	News	2012	#REF!
1	Nature	Letter	letter	2013	#REF!	1	Acknowledgements
2	Nature	News Feature	News	2013	#REF!
3	Nature	Letter	letter	2013	#REF!	2	figure
4	Nature	Letter	letter	2013	#REF!	2	Methods	value
5	Nature	Letter	letter	2013	#REF!	2	figure
6	Nature	News story	News	2013	#REF!
7	Nature	Article	Article	2013	#REF!	3	Incorrect data
8	Nature	Letter	letter	2013	#REF!	3	Geological datation
9	Nature	Letter	letter	2013	#REF!	3	Result	table supplementary
10	Nature	Letter	letter	2013	#REF!	2	Equation
11	Nature	Article	Article	2013	#REF!	3	Supplementary material
12	Nature	News story	News	2013	#REF!
13	Nature	Letter	letter	2013	#REF!	3	figure
14	Nature	Article	Article	2013	#REF!	1	author
15	Nature	Letter	letter	2013	#REF!	1	Conflict of interest
16	Nature	Letter	letter	2013	#REF!	1	Coordenates
17	Nature	World View	varis	2013	#REF!
18	Nature	Letter	letter	2013	#REF!	1	figure
19	Nature	Letter	letter	2013	#REF!	1	Reference
20	Nature	News story	News	2013	#REF!
21	Nature	News story	News	2013	#REF!
22	Nature	Letter	letter	2013	#REF!	2	figure
23	Nature	Letter	letter	2013	#REF!	2	Supplementary material
24	Nature	Letter	letter	2013	#REF!	2	Supplementary material
25	Nature	News Feature	News	2013	#REF!
26	Nature	News Feature	News	2013	#REF!
27	Nature	Comment	varis	2013	#REF!
28	Nature	News	News	2013	#REF!
29	Nature	News	News	2013	#REF!
30	Nature	Article	Article	2013	#REF!	3	figure and table
1	Nature	Article	Article	2014	14
2	Nature	Letter	letter	2014	1692	2	Figure
3	Nature	Letter	letter	2014	274	2	Figure
4	Nature	Article	Article	2014	2164	3	figure
5	Nature	Article	Article	2014	1663	2	Supplementary material
6	Nature	Article	Article	2014	365	3	Result
7	Nature	Article	Article	2014	2174	3	Result
8	Nature	Letter	letter	2014	116	2	Figure
9	Nature	Article	Article	2014	197	2	clarification
10	Nature	Article	Article	2014	260	1	Code
11	Nature	Article	Article	2014	144	1	Conflict of interest
12	Nature	Article	Article	2014	162	1	author
13	Nature	Letter	letter	2014	592	2	Figure
14	Nature	Article	Article	2014	92	1	author
15	Nature	Letter	letter	2014	43	2	Table
16	Nature	Article	Article	2014	15
17	Nature	Letter	letter	2014	57	1	author
18	Nature	Article	Article	2014	435	3	Table suppl ma
19	Nature	Article	Article	2014	298	2	figure
20	Nature	Letter	letter	2014	414	1	Acknowledgements
21	Nature	Letter	letter	2014	261	2	clarification
22	Nature	Article	Article	2014	1933	3	Supplementary material
23	Nature	News	News	2014	17
24	Nature	News	News	2014	9
25	Nature	News	News	2014	37
26	Nature	News	News	2014	27
27	Nature	News	News	2014	8
28	Nature	Article	Article	2014	2576	2	Supplementary material
29	Nature	Letter	letter	2014	162	2	Code
30	Nature	Letter	letter	2014	1310	3	Result
1	Science	Research news	varis	1993	#REF!
2	Science	News & Comment	News	1993	#REF!
3	Science	News & Comment	News	1993	#REF!
4	Science	Reports	varis	1993	#REF!	2	figure
5	Science	Research news	varis	1993	#REF!
6	Science	Research news	varis	1993	#REF!
7	Science	Article	Article	1993	#REF!	1	sentence
8	Science	Research news	varis	1993	#REF!
9	Science	Article	Article	1993	#REF!	2	sentence
10	Science	News	News	1993	#REF!
11	Science	Reports	varis	1993	#REF!
12	Science	News	News	1993	#REF!
13	Science	Article	Article	1993	#REF!	1	reference
14	Science	News	News	1993	#REF!
15	Science	Perspectives	varis	1993	#REF!
16	Science	Perspectives	varis	1993	#REF!
17	Science	Reports	varis	1993	#REF!	1	author
18	Science	Research news	varis	1993	#REF!
19	Science	Reports	varis	1993	#REF!	2	figure
20	Science	Research news	varis	1993	#REF!
21	Science	Reviews	Review	1993	#REF!	1	Typo
22	Science	News & Comment	News	1993	#REF!
23	Science	News	News	1993	#REF!
24	Science	Article	Article	1993	#REF!	2	figure
25	Science	Reports	varis	1993	#REF!	1	genbank
26	Science	Research news	varis	1993	#REF!
27	Science	Article	Article	1993	#REF!	2	equation
28	Science	Book reviews	varis	1993	#REF!
29	Science	Reports	varis	1993	#REF!
30	Science	Reports	varis	1993	#REF!	1	reference
1	Science	News	News	1994	#REF!
2	Science	Research news	varis	1994	#REF!
3	Science	News & Comment	News	1994	#REF!
4	Science	Article	Article	1994	#REF!	2	sentence
5	Science	Article	Article	1994	#REF!	2	figure
6	Science	letters	letter	1994	#REF!
7	Science	News & Comment	News	1994	#REF!
8	Science	Research news	varis	1994	#REF!
9	Science	Book reviews	varis	1994	#REF!
10	Science	Reports	varis	1994	#REF!	1	sentence
11	Science	Reports	varis	1994	#REF!	2	reference
12	Science	Editorial	Editorial	1994	#REF!
13	Science	News & Comment	News	1994	#REF!
14	Science	Technical Comments	varis	1994	#REF!
15	Science	Article	Article	1994	#REF!
16	Science	News & Comment	News	1994	#REF!
17	Science	News & Comment	News	1994	#REF!
18	Science	Editorial	Editorial	1994	#REF!
19	Science	Research news	varis	1994	#REF!
20	Science	Policy Forum	varis	1994	#REF!
21	Science	Policy Forum	varis	1994	#REF!
22	Science	Reports	varis	1994	#REF!	1	Word
23	Science	Reports	varis	1994	#REF!	2	figure
24	Science	Reports	varis	1994	#REF!	1	author
25	Science	Reports	varis	1994	#REF!	3	clarification
26	Science	Reports	varis	1994	#REF!	3	Figure	clarification
27	Science	Reports	varis	1994	#REF!	1	scientific name
28	Science	Perspectives	varis	1994	#REF!
29	Science	Research articles	Article	1994	#REF!	2	figure
30	Science	Reports	varis	1994	#REF!	1	Word
1	Science	Letters	letter	1995	#REF!
2	Science	Perspectives	varis	1995	#REF!
3	Science	News	News	1995	#REF!
4	Science	Editorial	Editorial	1995	#REF!
5	Science	Letters	letter	1995	#REF!
6	Science	Letters	letter	1995	#REF!
7	Science	Reports	varis	1995	#REF!	1	reference
8	Science	News	News	1995	#REF!
9	Science	Technical Comments	varis	1995	#REF!
10	Science	Research articles	Article	1995	#REF!	1	author
11	Science	Reports	varis	1995	#REF!	1	author
12	Science	Technical Comments	varis	1995	#REF!
13	Science	News & Comment	News	1995	#REF!
14	Science	News	News	1995	#REF!
15	Science	Reports	varis	1995	#REF!	2	reference
16	Science	Letters	letter	1995	#REF!
17	Science	Letters	letter	1995	#REF!
18	Science	Editorial	Editorial	1995	#REF!
19	Science	News	News	1995	#REF!
20	Science	News	News	1995	#REF!
21	Science	Research News	varis	1995	#REF!
22	Science	Book reviews	varis	1995	#REF!
23	Science	Reseach articles	Article	1995	#REF!	3	figure
24	Science	Perspectives	varis	1995	#REF!
25	Science	News	News	1995	#REF!
26	Science	Reports	varis	1995	#REF!	2	aminoacid postion
27	Science	Reports	varis	1995	#REF!	1	funding
28	Science	Random samples	varis	1995	#REF!
29	Science	News	News	1995	#REF!
30	Science	letters	letter	1995	#REF!
1	Science	letters	letter	1996	#REF!
2	Science	letters	letter	1996	#REF!
3	Science	News	News	1996	#REF!
4	Science	Reseach news	varis	1996	#REF!
5	Science	Reports	varis	1996	#REF!	3	Result
6	Science	letters	letter	1996	#REF!
7	Science	Reports	varis	1996	#REF!	1	author
8	Science	News	News	1996	#REF!
9	Science	Editorial	Editorial	1996	#REF!
10	Science	Research articles	Article	1996	#REF!	2	figure
11	Science	letters	letter	1996	#REF!
12	Science	Research news	varis	1996	#REF!
13	Science	Reports	varis	1996	#REF!	1	title
14	Science	Research articles	Article	1996	#REF!	2	figure
15	Science	Reports	varis	1996	#REF!	2	figure
16	Science	News	News	1996	#REF!
17	Science	Reports	varis	1996	#REF!	3	result
18	Science	News & Comment	News	1996	#REF!
19	Science	Reports	varis	1996	#REF!
20	Science	Book reviews	varis	1996	#REF!
21	Science	Research News	varis	1996	#REF!
22	Science	Letters	letter	1996	#REF!
23	Science	Reports	varis	1996	#REF!	1	author
24	Science	Letters	letter	1996	#REF!
25	Science	News & Comment	News	1996	#REF!
26	Science	Letters	letter	1996	#REF!
27	Science	Article	Article	1996	#REF!	1	link
28	Science	Reports	varis	1996	#REF!	1	Acknowledgements
29	Science	Reports	varis	1996	#REF!	2	figure
30	Science	Reports	varis	1996	#REF!	1	figure
1	Science	Letters	letter	1997	#REF!
2	Science	Articles	Article	1997	#REF!	1	Typo
3	Science	Research news	varis	1997	#REF!
4	Science	Research Article	Article	1997	#REF!	1	author
5	Science	Special News report	varis	1997	#REF!
6	Science	Research news	varis	1997	#REF!
7	Science	Editorial	Editorial	1997	#REF!
8	Science	Letters	letter	1997	#REF!
9	Science	Articles	Article	1997	#REF!	2	figure
10	Science	Research News	varis	1997	#REF!
11	Science	Report	varis	1997	#REF!	3	figure
12	Science	Research News	varis	1997	#REF!
13	Science	Letters	letter	1997	#REF!
14	Science	Report	varis	1997	#REF!	1	author
15	Science	Articles	Article	1997	#REF!	1	figure
16	Science	Report	varis	1997	#REF!	3	result
17	Science	Research News	varis	1997	#REF!
18	Science	News & Comments	News	1997	#REF!
19	Science	Science news	varis	1997	#REF!
20	Science	Technical Sight	varis	1997	#REF!
21	Science	News & Comments	News	1997	#REF!
22	Science	Letters	letter	1997	#REF!
23	Science	Research News	varis	1997	#REF!
24	Science	Research News	varis	1997	#REF!
25	Science	Technical Comments	varis	1997	#REF!
26	Science	Report	varis	1997	#REF!	2	equation
27	Science	Perspectives	varis	1997	#REF!
28	Science	News	News	1997	#REF!
29	Science	Perspectives	varis	1997	#REF!
30	Science	Research Article	Article	1997	#REF!	2	figure
1	Science	News of the Week	News	1998	#REF!
2	Science	Research Article	Article	1998	#REF!	2	formula
3	Science	News of the Week	News	1998	#REF!
4	Science	News of the Week	News	1998	#REF!
5	Science	Policy Forum	varis	1998	#REF!
6	Science	Perspectives	varis	1998	#REF!
7	Science	News Focus	News	1998	#REF!
8	Science	Letters	letter	1998	#REF!
9	Science	News of the Week	News	1998	#REF!
10	Science	Letters	letter	1998	#REF!
11	Science	Report	varis	1998	#REF!	2	footnote
12	Science	News Focus	News	1998	#REF!
13	Science		varis	1998	#REF!
14	Science	Report	varis	1998	#REF!	2	result and author
15	Science	Review	Review	1998	#REF!	1	Value
16	Science	Letters	letter	1998	#REF!
17	Science	Perspectives	varis	1998	#REF!
18	Science	News Focus	News	1998	#REF!
19	Science		varis	1998	#REF!
20	Science	Report	varis	1998	#REF!	1	Word
21	Science	News	News	1998	#REF!		author
22	Science	Editorial	Editorial	1998	#REF!
23	Science	Letters	letter	1998	#REF!
24	Science	Report	varis	1998	#REF!	3	figure
25	Science	Research Article	Article	1998	#REF!	2	figure
26	Science	News of the Week	News	1998	#REF!
27	Science	Report	varis	1998	#REF!	2	Value
28	Science	Report	varis	1998	#REF!	2	Value
29	Science	Report	varis	1998	#REF!	1	author
30	Science	Research Article	Article	1998	#REF!	3	Value
1	Science	News	News	1999	#REF!
2	Science	Report	varis	1999	#REF!	1	author
3	Science	Report	varis	1999	#REF!	3	Result
4	Science	News of the Week	News	1999	#REF!
5	Science	Software	varis	1999	#REF!
6	Science	Letters	letter	1999	#REF!
7	Science	News Focus	News	1999	#REF!
8	Science	News of the Week	News	1999	#REF!
9	Science	News Focus	News	1999	#REF!
10	Science	Report	varis	1999	#REF!
11	Science	Perspectives	varis	1999	#REF!
12	Science	News Focus	News	1999	#REF!
13	Science	News	News	1999	#REF!
14	Science	News Focus	News	1999	#REF!
15	Science	News Focus	News	1999	#REF!
16	Science	News Focus	News	1999	#REF!
17	Science	Perspectives	varis	1999	#REF!
18	Science	Editors Choice	varis	1999	#REF!
19	Science	Letters	letter	1999	#REF!
20	Science	Perspectives	varis	1999	#REF!
21	Science	Perspectives	varis	1999	#REF!
22	Science	Nota	varis	1999	#REF!
23	Science	Report	varis	1999	#REF!	1	link
24	Science	Editors Choice	varis	1999	#REF!
25	Science	Report	varis	1999	#REF!	2	table
26	Science	News of the Week	News	1999	#REF!
27	Science	News of the Week	News	1999	#REF!
28	Science	Report	varis	1999	#REF!	2	sentence
29	Science	Perspectives	varis	1999	#REF!
30	Science	Report	varis	1999	#REF!	2	figure
1	Science	Letters	letter	2000	#REF!
2	Science	Pathways of Discovery	varis	2000	#REF!
3	Science	Report	varis	2000	#REF!	1	link
4	Science	News Focus	News	2000	#REF!
5	Science	Policy Forum	varis	2000	#REF!
6	Science	Report	varis	2000	#REF!	3	figure
7	Science	News	News	2000	#REF!
8	Science	Report	varis	2000	#REF!	2	equation
9	Science	News	News	2000	#REF!
10	Science	Letters	letter	2000	#REF!
11	Science	News of the Week	News	2000	#REF!
12	Science	Report	varis	2000	#REF!	1	figure
13	Science	News Focus	News	2000	#REF!
14	Science	Perspectives	varis	2000	#REF!
15	Science	Report	varis	2000	#REF!	2	figure
16	Science	News of the Week	News	2000	#REF!
17	Science	News Focus	News	2000	#REF!
18	Science	News Focus	News	2000	#REF!
19	Science	News of the Week	News	2000	#REF!
20	Science	News Focus	News	2000	#REF!
21	Science	Letters	letter	2000	#REF!
22	Science	Policy Forum	varis	2000	#REF!
23	Science	Perspectives	varis	2000	#REF!
24	Science	Report	varis	2000	#REF!	2	figure
25	Science	Report	varis	2000	#REF!	1	figure
26	Science	Letters	letter	2000	#REF!
27	Science	Review	Review	2000	#REF!	2	figure
28	Science	Perspectives	varis	2000	#REF!
29	Science	Report	varis	2000	#REF!	1	Typo
30	Science	News Focus	News	2000	#REF!
1	Science	Report	varis	2001	#REF!	1	reference
2	Science	News of the Week	News	2001	#REF!
3	Science	Review	Review	2001	#REF!	1	reference	word
4	Science	Report	varis	2001	#REF!	1	author
5	Science	Report	varis	2001	#REF!	2	figure
6	Science	Research Article	Article	2001	#REF!
7	Science	Perspectives	varis	2001	#REF!
8	Science	Books et al.	varis	2001	#REF!
9	Science	News Focus	News	2001	#REF!
10	Science	Report	varis	2001	#REF!	2	coordenates	figure
11	Science	This week in science	varis	2001	#REF!
12	Science	News of the Week	News	2001	#REF!
13	Science	Report	varis	2001	#REF!	1	link
14	Science	Letters	letter	2001	#REF!
15	Science	News	News	2001	#REF!
16	Science	Policy Forum	varis	2001	#REF!
17	Science	Letters	letter	2001	#REF!
18	Science	Report	varis	2001	#REF!	1	author
19	Science	News Focus	News	2001	#REF!
20	Science	News of the Week	News	2001	#REF!
21	Science	Report	varis	2001	#REF!	1	reference
22	Science	Perspectives	varis	2001	#REF!
23	Science	Letters	letter	2001	#REF!
24	Science	Brevia	varis	2001	#REF!	1	author
25	Science	Pathways of Discovery	varis	2001	#REF!
26	Science	News of the Week	News	2001	#REF!
27	Science	News Focus	News	2001	#REF!
28	Science	News of the Week	News	2001	#REF!
29	Science	Technical Comments	varis	2001	#REF!
30	Science	Perspectives	varis	2001	#REF!
1	Science	Report	varis	2002	#REF!	1	Typo
2	Science	Perspectives	varis	2002	#REF!
3	Science	Perspectives	varis	2002	#REF!
4	Science	Perspectives	varis	2002	#REF!
5	Science	News Focus	News	2002	#REF!
6	Science	Report	varis	2002	#REF!	1	reference
7	Science	Report	varis	2002	#REF!	2	genbank	supplementary material
8	Science	Report	varis	2002	#REF!	2	figure
9	Science	Research Article	Article	2002	#REF!	1	author
10	Science	Report	varis	2002	#REF!	1	equation
11	Science	Report	varis	2002	#REF!	1	author
12	Science	News of the Week	News	2002	#REF!
13	Science	Association Affairs	varis	2002	#REF!
14	Science	Perspectives	varis	2002	#REF!
15	Science	News Focus	News	2002	#REF!
16	Science	News of the Week	News	2002	#REF!
17	Science	News of the Week	News	2002	#REF!
18	Science	News Focus	News	2002	#REF!
19	Science	News	News	2002	#REF!
20	Science	Report	varis	2002	#REF!	1	Acknowledgements
21	Science	News Focus	News	2002	#REF!
22	Science	Report	varis	2002	#REF!	1	Typo
23	Science	Books et al.	varis	2002	#REF!
24	Science	Research Article	Article	2002	#REF!	1	Typo
25	Science	Brevia	varis	2002	#REF!	1	author
26	Science	Report	varis	2002	#REF!	1	author
27	Science	Viewpoint	varis	2002	#REF!
28	Science	News Focus	News	2002	#REF!
29	Science	News of the Week	News	2002	#REF!
30	Science	News of the Week	News	2002	#REF!
1	Science	News of the Week	News	2003	#REF!
2	Science	Report	varis	2003	#REF!	2	formula
3	Science	Editors Choice	varis	2003	#REF!
4	Science	News Focus	News	2003	#REF!
5	Science	Report	varis	2003	#REF!	1	reference
6	Science	News Focus	News	2003	#REF!
7	Science	News	News	2003	#REF!
8	Science	Research Article	Article	2003	#REF!	1	author
9	Science	Report	varis	2003	#REF!	2	clarification
10	Science	News of the Week	News	2003	#REF!
11	Science	Report	varis	2003	#REF!	1	footnote
12	Science	Report	varis	2003	#REF!	2	figure
13	Science	Report	varis	2003	#REF!	1	author
14	Science	Report	varis	2003	#REF!	1	author
15	Science	Viewpoint	varis	2003	#REF!
16	Science	Perspectives	varis	2003	#REF!
17	Science	Report	varis	2003	#REF!	1	Word
18	Science	Research Article	Article	2003	#REF!	1	author
19	Science	Report	varis	2003	#REF!	1	Value
20	Science	News Focus	News	2003	#REF!
21	Science	Policy Forum	varis	2003	#REF!
22	Science	Report	varis	2003	#REF!	2	Figure
23	Science	Report	varis	2003	#REF!	1	author
24	Science	News of the Week	News	2003	#REF!
25	Science	News Focus	News	2003	#REF!
26	Science	News Focus	News	2003	#REF!
27	Science	Special issue	varis	2003	#REF!
28	Science	Brevia	varis	2003	#REF!	1	Typo
29	Science	Special issue	varis	2003	#REF!
30	Science	Report	varis	2003	#REF!	1	reference
1	Science	News of the Week	News	2004	#REF!
2	Science	News of the Week	News	2004	#REF!
3	Science	Report	varis	2004	#REF!	2	figure
4	Science	Policy Forum	varis	2004	#REF!
5	Science	News Focus	News	2004	#REF!
6	Science	Report	varis	2004	#REF!	3	Result
7	Science	News of the Week	News	2004	#REF!
8	Science	Viewpoint	varis	2004	#REF!
9	Science	Report	varis	2004	#REF!	2	figure
10	Science	Report	varis	2004	#REF!	2	figure	acknowledgements
11	Science	News Focus	News	2004	#REF!
12	Science	Report	varis	2004	#REF!	1	Typo
13	Science	News	News	2004	#REF!
14	Science	Report	varis	2004	#REF!	1	reference
15	Science	Presidential forum	varis	2004	#REF!
16	Science	News of the Week	News	2004	#REF!
17	Science	News Focus	News	2004	#REF!
18	Science	Books et al.	varis	2004	#REF!
19	Science	News Focus	News	2004	#REF!
20	Science	Report	varis	2004	#REF!	2	figure
21	Science	Report	varis	2004	#REF!	1	reference
22	Science	News of the Week	News	2004	#REF!
23	Science	News Focus	News	2004	#REF!
24	Science	Report	varis	2004	#REF!	3	clarification
25	Science	Introduction to special issue	varis	2004	#REF!
26	Science	Perspectives	varis	2004	#REF!
27	Science	News of the Week	News	2004	#REF!
28	Science	News of the Week	News	2004	#REF!
29	Science	Report	varis	2004	#REF!	2	figure
30	Science	News of the Week	News	2004	#REF!
1	Science	News Focus	News	2005	#REF!
2	Science	Report	varis	2005	#REF!	1	Typo
3	Science	Letters	letter	2005	#REF!
4	Science	Perspectives	varis	2005	#REF!
5	Science	Report	varis	2005	#REF!	3	result
6	Science	Introduction to special issue	varis	2005	#REF!
7	Science	News Focus	News	2005	#REF!
8	Science	News Focus	News	2005	#REF!
9	Science	Viewpoint	varis	2005	#REF!
10	Science	Report	varis	2005	#REF!	3	figure
11	Science	News Focus	News	2005	#REF!
12	Science	Report	varis	2005	#REF!	2	Reference	supplementary material
13	Science	Report	varis	2005	#REF!	3	statistics
14	Science	Report	varis	2005	#REF!	2	Figure an reference
15	Science	Special Feature	varis	2005	#REF!
16	Science	Policy Forum	varis	2005	#REF!
17	Science	News Focus	News	2005	#REF!
18	Science	News of the Week	News	2005	#REF!
19	Science	Policy Forum	varis	2005	#REF!
20	Science	Report	varis	2005	#REF!	2	sentence	figure
21	Science	Brevia	varis	2005	#REF!	1	link
22	Science	News of the Week	News	2005	#REF!
23	Science	Report	varis	2005	#REF!	2	Value
24	Science	Report	varis	2005	#REF!	2	equation
25	Science	Research Article	Article	2005	#REF!	1	Acknowledgements
26	Science	Report	varis	2005	#REF!	3	figure	result
27	Science	Report	varis	2005	#REF!	2	sentence	figure
28	Science	Letters	letter	2005	#REF!
29	Science	Report	varis	2005	#REF!	1	funding
30	Science	Report	varis	2005	#REF!	2	table
1	Science	Report	varis	2006	#REF!	1	Acknowledgements
2	Science	Research Article	Article	2006	#REF!	1	Acknowledgements
3	Science	News Focus	News	2006	#REF!
4	Science	News Focus	News	2006	#REF!
5	Science	Policy Forum	varis	2006	#REF!
6	Science	Special Feature	varis	2006	#REF!
7	Science	News of the Week	News	2006	#REF!
8	Science	Report	varis	2006	#REF!	1	reference
9	Science	Report	varis	2006	#REF!	1	author
10	Science	Perspectives	varis	2006	#REF!
11	Science	Report	varis	2006	#REF!	2	figure
12	Science	Science Scope	varis	2006	#REF!
13	Science	Report	varis	2006	#REF!	2	figure
14	Science	Report	varis	2006	#REF!	2	table
15	Science	Report	varis	2006	#REF!	1	clarification
16	Science	Report	varis	2006	#REF!	2	figure
17	Science	Special Feature	varis	2006	#REF!
18	Science	News of the Week	News	2006	#REF!
19	Science	News of the Week	News	2006	#REF!
20	Science	Report	varis	2006	#REF!	3	result
21	Science	Report	varis	2006	#REF!	3	result
22	Science	Policy Forum	varis	2006	#REF!
23	Science	Report	varis	2006	#REF!	2	Reference	table supplementary material
24	Science	News	News	2006	#REF!
25	Science	Report	varis	2006	#REF!	1	Typo
26	Science	Policy Forum	varis	2006	#REF!
27	Science	Perspectives	varis	2006	#REF!
28	Science	News of the Week	News	2006	#REF!
29	Science	News Focus	News	2006	#REF!
30	Science	Report	varis	2006	#REF!	3	Result	figure	table
1	Science	Policy Forum	varis	2007	#REF!
2	Science	Report	varis	2007	#REF!	2	table
3	Science	Report	varis	2007	#REF!	1	figure
4	Science	News of the Week	News	2007	#REF!
5	Science	Report	varis	2007	#REF!	1	author
6	Science	News Focus	News	2007	#REF!
7	Science	Report	varis	2007	#REF!	2	figure
8	Science	Report	varis	2007	#REF!	2	Reference
9	Science	Report	varis	2007	#REF!	2	sentence
10	Science	Report	varis	2007	#REF!	1	author
11	Science	Editorial	Editorial	2007	#REF!
12	Science	News Focus	News	2007	#REF!
13	Science	News of the Week	News	2007	#REF!
14	Science	News of the Week	News	2007	#REF!
15	Science	Letters	letter	2007	#REF!
16	Science	Report	varis	2007	#REF!	2	clarification
17	Science	Report	varis	2007	#REF!	2	figure
18	Science	Report	varis	2007	#REF!	2	figure
19	Science	News Focus	News	2007	#REF!
20	Science	Research Article	Article	2007	#REF!
21	Science	News Focus	News	2007	#REF!
22	Science	Report	varis	2007	#REF!	3	figure
23	Science	Report	varis	2007	#REF!
24	Science	News Focus	News	2007	#REF!
25	Science	Report	varis	2007	#REF!	1	link
26	Science	Books et al.	varis	2007	#REF!
27	Science	Report	varis	2007	#REF!	2	sentence
28	Science	Essays	varis	2007	#REF!
29	Science	News Focus	News	2007	#REF!
30	Science	Perspectives	varis	2007	#REF!
1	Science	News	News	2008	#REF!
2	Science	Brevia	varis	2008	#REF!
3	Science	Report	varis	2008	#REF!
4	Science	News of the Week	News	2008	#REF!
5	Science	Review	Review	2008	#REF!
6	Science	Perspectives	varis	2008	#REF!	2	sentence
7	Science	Report	varis	2008	#REF!	2	Reference
8	Science	Report	varis	2008	#REF!	1	link
9	Science	Report	varis	2008	#REF!	2	sentence
10	Science	Books et al.	varis	2008	#REF!
11	Science	Report	varis	2008	#REF!
12	Science	Report	varis	2008	#REF!	3	Figure	sentence
13	Science	Report	varis	2008	#REF!
14	Science	Research Article	Article	2008	#REF!	3	figure
15	Science	Perspectives	varis	2008	#REF!
16	Science	News Focus	News	2008	#REF!
17	Science	Letters	letter	2008	#REF!
18	Science	News	News	2008	#REF!
19	Science	Report	varis	2008	#REF!	2	Supplementary material
20	Science	Books et al.	varis	2008	#REF!
21	Science	Books et al.	varis	2008	#REF!
22	Science	News of the Week	News	2008	#REF!
23	Science	Report	varis	2008	#REF!	2	Figure
24	Science	Report	varis	2008	#REF!	2	figure
25	Science	Report	varis	2008	#REF!	2	sentence
26	Science	Report	varis	2008	#REF!	2	figure
27	Science	Report	varis	2008	#REF!	3	result
28	Science	Report	varis	2008	#REF!	2	equation
29	Science	Report	varis	2008	#REF!	3	statistics
30	Science	Editorial	Editorial	2008	#REF!
1	Science	News Focus	News	2009	#REF!
2	Science	Report	varis	2009	#REF!	2	figure
3	Science	Letters	letter	2009	#REF!
4	Science	Brevia	varis	2009	#REF!	2	sentence
5	Science	Report	varis	2009	#REF!	1	author
6	Science	Report	varis	2009	#REF!	1	title
7	Science	Report	varis	2009	#REF!	2	figure
8	Science	Report	varis	2009	#REF!	3	figure	result
9	Science	Report	varis	2009	#REF!	2	Reference
10	Science	News	News	2009	#REF!
11	Science	Education Forum	varis	2009	#REF!
12	Science	Report	varis	2009	#REF!	1	Reference
13	Science	Report	varis	2009	#REF!	2	setnence	reference
14	Science	Brevia	varis	2009	#REF!	2	figure
15	Science	Report	varis	2009	#REF!	2	sentence
16	Science	News Focus	News	2009	#REF!
17	Science	News Focus	News	2009	#REF!
18	Science	News of the Week	News	2009	#REF!
19	Science	News of the Week	News	2009	#REF!
20	Science	News of the Week	News	2009	#REF!
21	Science	Research Article	Article	2009	#REF!	3	figure
22	Science	Report	varis	2009	#REF!	3	Figure
23	Science	News Focus	News	2009	#REF!
24	Science	Review	Review	2009	#REF!	2	Figure
25	Science	Perspectives	varis	2009	#REF!
26	Science	Report	varis	2009	#REF!	1	author
27	Science	Report	varis	2009	#REF!	3	Figure
28	Science	Books et al.	varis	2009	#REF!
29	Science	Policy Forum	varis	2009	#REF!
30	Science	Report	varis	2009	#REF!	2	Figure
1	Science	Letters	letter	2010	#REF!
2	Science	Essays	varis	2010	#REF!
3	Science	News	News	2010	#REF!
4	Science	News	News	2010	#REF!
5	Science	Report	varis	2010	#REF!	1	clarification
6	Science	Report	varis	2010	#REF!	1	author
7	Science	News Focus	News	2010	#REF!
8	Science	Report	varis	2010	#REF!	1	Supplementary material
9	Science	Perspective	varis	2010	#REF!
10	Science	Report	varis	2010	#REF!	1	Reference
11	Science	Report	varis	2010	#REF!	1	Reference
12	Science	Report	varis	2010	#REF!	2	sentence
13	Science	Policy Forum	varis	2010	#REF!
14	Science	Perspectives	varis	2010	#REF!
15	Science	Report	varis	2010	#REF!	1	figure
16	Science	Report	varis	2010	#REF!	2	result
17	Science	Research Article	Article	2010	#REF!	1	Reference
18	Science	Letters	letter	2010	#REF!
19	Science	Prespectives	varis	2010	#REF!
20	Science	News Focus	News	2010	#REF!
21	Science	News Focus	News	2010	#REF!
22	Science	Report	varis	2010	#REF!	1	Acknowledgements
23	Science	News of the Week	News	2010	#REF!
24	Science	Research Article	Article	2010	#REF!	2	figure
25	Science	Books et al.	varis	2010	#REF!
26	Science	Report	varis	2010	#REF!	1	author
27	Science	News Focus	News	2010	#REF!
28	Science	News Focus	News	2010	#REF!
29	Science	Research Article	Article	2010	#REF!	1	Acknowledgements
30	Science	Research Article	Article	2010	#REF!	3	figure
1	Science	Report	varis	2011	#REF!	1	figure
2	Science	News & Analysis	News	2011	#REF!
3	Science	Education Forum	varis	2011	#REF!
4	Science	News Focus	News	2011	#REF!
5	Science	Report	varis	2011	#REF!	1	Reference
6	Science	Report	varis	2011	#REF!	3	Figure
7	Science	Report	varis	2011	#REF!	2	table
8	Science	Books et al.	varis	2011	#REF!
9	Science	Review	Review	2011	#REF!	1	Reference
10	Science	News Focus	News	2011	#REF!
11	Science	Report	varis	2011	#REF!	2	Methods
12	Science	News Focus	News	2011	#REF!
13	Science	Report	varis	2011	#REF!	1	author
14	Science	Report	varis	2011	#REF!	1	author
15	Science	News Focus	News	2011	#REF!
16	Science	News & Analysis	News	2011	#REF!
17	Science	Report	varis	2011	#REF!	1	sentence
18	Science	Research Article	Article	2011	#REF!	2	figure
19	Science	News Focus	News	2011	#REF!
20	Science	Policy Forum	varis	2011	#REF!
21	Science	Report	varis	2011	#REF!	2	Methods
22	Science	News & Analysis	News	2011	#REF!
23	Science	Report	varis	2011	#REF!	2	Figure
24	Science	Perspectives	varis	2011	#REF!
25	Science	Report	varis	2011	#REF!	3	clarification
26	Science	Research Article	Article	2011	#REF!	3	Methods	figure
27	Science	News & Analysis	News	2011	#REF!
28	Science	Report	varis	2011	#REF!	2	Result value
29	Science	Report	varis	2011	#REF!	3	Result	figure
30	Science	Report	varis	2011	#REF!	2	Figure
1	Science	Perspectives	varis	2012	#REF!
2	Science	Report	varis	2012	#REF!	1	Reference
3	Science	News & Analysis	News	2012	#REF!
4	Science	News Focus	News	2012	#REF!
5	Science	Perspective	varis	2012	#REF!
6	Science	News Focus	News	2012	#REF!
7	Science	News Focus	News	2012	#REF!
8	Science	Review	Review	2012	#REF!	2	Figure
9	Science	No es podia accedir article	varis	2012	#REF!
10	Science	Letters	letter	2012	#REF!
11	Science	Perspective	varis	2012	#REF!
12	Science	News & Analysis	News	2012	#REF!
13	Science	Life science	varis	2012	#REF!
14	Science	News Focus	News	2012	#REF!
15	Science	Report	varis	2012	#REF!	2	Figure
16	Science	News & Analysis	News	2012	#REF!
17	Science	News & Analysis	News	2012	#REF!
18	Science	Report	varis	2012	#REF!	1	Typo
19	Science	Report	varis	2012	#REF!	1	title
20	Science	Perspective	varis	2012	#REF!
21	Science	Review	Review	2012	#REF!	1	Reference
22	Science	News & Analysis	News	2012	#REF!
23	Science	Letters	letter	2012	#REF!
24	Science	News & Analysis	News	2012	#REF!
25	Science	Perspective	varis	2012	#REF!
26	Science	Report	varis	2012	#REF!	1	Acknowledgements
27	Science	Perspective	varis	2012	#REF!
28	Science	Report	varis	2012	#REF!	1	author
29	Science	News Focus	News	2012	#REF!
30	Science	Research Article	Article	2012	#REF!	1	author
1	Science	Reports	varis	2013	42	1	reference
2	Science	News & Analysis	News	2013	42
3	Science	Perspectives	varis	2013	35
4	Science	News Focus	News	2013	42
5	Science	News Focus	News	2013	35
6	Science	Reviews	Review	2013	28	1	Acknowledgements
7	Science	Reports	varis	2013	42	2	sentence
8	Science	Reports	varis	2013	70	2	Figure	acknowledgements
9	Science	Reports	varis	2013	3542	3	Figure
10	Science	News & Analysis	News	2013	35
11	Science	Reports	varis	2013	70	1	author
12	Science	Reports	varis	2013	1733	3	Result
13	Science	Reports	varis	2013	196	2	figure
14	Science	News	News	2013	35
15	Science	Reports	varis	2013	49	1	figure
16	Science	Plicy Forum	varis	2013	21
17	Science	Perspectives	varis	2013	14
18	Science	News & Analysis	News	2013	56
19	Science	News Focus	News	2013	182
20	Science	Books	varis	2013	35
21	Science	News Focus	News	2013	28
22	Science	Letters	letter	2013	14
23	Science	Reports	varis	2013	21	1	Acknowledgements
24	Science	Reports	varis	2013	21	1	author
25	Science	Reports	varis	2013	1736	3	Figure
26	Science	Reports	varis	2013	196	1	figure
27	Science	Reports	varis	2013	63	2	equation
28	Science	News & Analysis	News	2013	28
29	Science	Association Affairs	varis	2013	28
30	Science	Perspectives	varis	2013	259
1	Science	Reports	varis	2014	#REF!	2	Figure
2	Science	Reports	varis	2014	#REF!	1	author
3	Science	News Focus	News	2014	#REF!
4	Science	Reports	varis	2014	#REF!	1	Typo
5	Science	Reports	varis	2014	#REF!	1	author
6	Science	Letters	letter	2014	#REF!
7	Science	Reports	varis	2014	#REF!	2	sentence
8	Science	Reports	varis	2014	#REF!	1	funding
9	Science	News & Analysis	News	2014	#REF!
10	Science	News Focus	News	2014	#REF!
11	Science	News Focus	News	2014	#REF!
12	Science	Reports	varis	2014	#REF!	2	clarification
13	Science	Reviews	Review	2014	#REF!	2	Figure	reference
14	Science	News & Analysis	News	2014	#REF!
15	Science	Reports	varis	2014	#REF!	1	funding
16	Science		Article	2014	#REF!	2	formula
17	Science	Reports	varis	2014	#REF!	1	Typo
18	Science	Perspectives	varis	2014	#REF!
19	Science	Reports	varis	2014	#REF!	1	Acknowledgements
20	Science	Research article	Article	2014	#REF!	1	author
21	Science	Reports	varis	2014	#REF!	3	Result
22	Science	Reports	varis	2014	#REF!	3	Result	figure
23	Science	Reports	varis	2014	#REF!	3	Result	figure
24	Science	Reports	varis	2014	#REF!	1	author
25	Science	Reports	varis	2014	#REF!	2	Figure
26	Science	Research article	Article	2014	#REF!	1	author
27	Science	Reports	varis	2014	#REF!	3	Result	reference
28	Science	Perspectives	varis	2014	#REF!
29	Science	Reports	varis	2014	#REF!	2	Figure	supplementary material
30	Science	Perspectives	varis	2014	#REF!
1	PNAS	Biochemistry	Article	1993	#REF!	2	Result
2	PNAS	Pharmacology	Article	1993	#REF!	3	figure
3	PNAS	Genetics	Article	1993	#REF!	2	figure
4	PNAS	Cell biology	Article	1993	#REF!	2	reference
5	PNAS	Genetics	Article	1993	#REF!	2	Value
6	PNAS	Biochemistry	Article	1993	#REF!	2	dna sequence
7	PNAS	Biochemistry	Article	1993	#REF!	3	Result	Interpretation
8	PNAS	MEDICAL SCIENCES	Article	1993	#REF!	2	Table
9	PNAS	Cell biology	Article	1993	#REF!	2	Figure
10	PNAS	Biochemistry	Article	1993	#REF!	3	Table	result
11	PNAS	Biochemistry	Article	1993	#REF!	3	figure
12	PNAS	Immunology	Article	1993	#REF!	2	figure
13	PNAS	Biophysics	Article	1993	#REF!	1	Typo
14	PNAS	MEDICAL SCIENCES	Article	1993	#REF!	3	Figure	result
15	PNAS	Biochemistry	Article	1993	#REF!	2	Figure	reference
16	PNAS	MEDICAL SCIENCES	Article	1993	#REF!	2	sentence
17	PNAS	Immunology	Article	1993	#REF!	2	reference
18	PNAS	Immunology	Article	1993	#REF!	2	clarification
19	PNAS	Biochemistry	Article	1993	#REF!	3	Result
20	PNAS	Review	Article	1993	#REF!	1	title
21	PNAS	Biochemistry	Article	1993	#REF!	3	Result
22	PNAS	Cell biology	Article	1993	#REF!	1	Acknowledgements
23	PNAS	NEUROBIOLOGY	Article	1993	#REF!	2	figure
24	PNAS	Genetics	Article	1993	#REF!	2	sentence
25	PNAS	NEUROBIOLOGY	Article	1993	#REF!	2	figure
26	PNAS	Biochemistry	Article	1993	#REF!	3	Figure	result
27	PNAS	MEDICAL SCIENCES	Article	1993	#REF!	3	Result	Interpretation
28	PNAS	Biochemistry	Article	1993	#REF!	1	Table	figure
29	PNAS	Immunology	Article	1993	#REF!	2	reference	data
30	PNAS	Biochemistry	Article	1993	#REF!	3	Result	sequence
1	PNAS	Immunology	Article	1994	#REF!	2	Figure
2	PNAS	Developmental biology	Article	1994	#REF!	2	figure
3	PNAS	Biochemistry	Article	1994	#REF!	2	figure
4	PNAS	NEUROBIOLOGY	Article	1994	#REF!	2	figure
5	PNAS	Cell biology	Article	1994	#REF!	2	figure
6	PNAS	Biochemistry	Article	1994	#REF!	2	figure
7	PNAS	Physiology	Article	1994	#REF!	2	figure
8	PNAS	Genetics	Article	1994	#REF!	2	Methods
9	PNAS	Biochemistry	Article	1994	#REF!	3	retraction
10	PNAS	Biochemistry	Article	1994	#REF!	2	sentence
11	PNAS	Evolution	Article	1994	#REF!	2	reference	table
12	PNAS	Immunology	Article	1994	#REF!	2	sentence
13	PNAS	Biochemistry	Article	1994	#REF!	1	Acknowledgements
14	PNAS	Colloquium paper	varis	1994	#REF!	2	Value
15	PNAS	Biochemistry	Article	1994	#REF!	2	reference	table
16	PNAS	MEDICAL SCIENCES	Article	1994	#REF!	1	copyrigh figure
17	PNAS	PLANT BIOLOGY	Article	1994	#REF!	3	figure	sequence	genbank
18	PNAS	Developmental biology	Article	1994	#REF!	2	Value
19	PNAS	Pharmacology	Article	1994	#REF!	1	author
20	PNAS	Cell biology	Article	1994	#REF!	1	Word
21	PNAS	Biochemistry	Article	1994	#REF!	3	figure
22	PNAS	Biophysics	Article	1994	#REF!	1	Acknowledgements
23	PNAS	Genetics	Article	1994	#REF!	1	author
24	PNAS	Biochemistry	Article	1994	#REF!	2	title	table
25	PNAS	Biochemistry	Article	1994	#REF!	2	figure
26	PNAS	Developmental biology	Article	1994	#REF!	3	figure	gembank	result
27	PNAS	Cell biology	Article	1994	#REF!	2	sequence
28	PNAS	Agricultural sciences	Article	1994	#REF!	2	nomenclature
29	PNAS	MEDICAL SCIENCES	Article	1994	#REF!	3	Result	method
30	PNAS	MEDICAL SCIENCES	Article	1994	#REF!	3	result	figure	sequence
1	PNAS	Biochemistry	Article	1995	#REF!	2	figure
2	PNAS	Immunology	Article	1995	#REF!	2	sentence	reference
3	PNAS	Immunology	Article	1995	#REF!	2	sequence
4	PNAS	Immunology	Article	1995	#REF!	1	Typo
5	PNAS	Cell biology	Article	1995	#REF!	2	figure
6	PNAS	Cell biology	Article	1995	#REF!	2	figure
7	PNAS	Cell biology	Article	1995	#REF!	1	reference
8	PNAS	Biochemistry	Article	1995	#REF!	2	sentence
9	PNAS	Immunology	Article	1995	#REF!	2	figure
10	PNAS	Microbiology	Article	1995	#REF!	1	author
11	PNAS	Genetics	Article	1995	#REF!	2	sentence
12	PNAS	Immunology	Article	1995	#REF!	2	sequence
13	PNAS	Immunology	Article	1995	#REF!	2	nomenclature
14	PNAS	Biochemistry	Article	1995	#REF!	3	figure	sequence	result
15	PNAS	Microbiology	Article	1995	#REF!	2	figure
16	PNAS	MEDICAL SCIENCES	Article	1995	#REF!	3	Figure	table	result
17	PNAS	Developmental biology	Article	1995	#REF!	2	sentence
18	PNAS	Biochemistry	Article	1995	#REF!	2	figure
19	PNAS	Cell biology	Article	1995	#REF!	1	figure
20	PNAS	Biochemistry	Article	1995	#REF!	2	figure
21	PNAS	Cell biology	Article	1995	#REF!	2	figure
22	PNAS	NEUROBIOLOGY	Article	1995	#REF!	2	figure
23	PNAS	Immunology	Article	1995	#REF!	2	figure
24	PNAS	Biochemistry	Article	1995	#REF!	2	Value
25	PNAS	MEDICAL SCIENCES	Article	1995	#REF!	2	figure
26	PNAS	Cell biology	Article	1995	#REF!	1	author
27	PNAS	MEDICAL SCIENCES	Article	1995	#REF!	1	Word
28	PNAS	NEUROBIOLOGY	Article	1995	#REF!	2	figure
29	PNAS	Immunology	Article	1995	#REF!	2	figure
30	PNAS	Immunology	Article	1995	#REF!	2	figure
1	PNAS	Immunology	Article	1996	#REF!	2	figure
2	PNAS	Biochemistry	Article	1996	#REF!	2	Figure
3	PNAS	Psychology	Article	1996	#REF!	1	encabezamiento
4	PNAS	Biochemistry	Article	1996	#REF!	2	figure
5	PNAS	Physiology	Article	1996	#REF!	1	reference
6	PNAS	Immunology	Article	1996	#REF!	2	methods	abstract
7	PNAS	Biochemistry	Article	1996	#REF!	2	sentence
8	PNAS	Evolution	Article	1996	#REF!	1	Date
9	PNAS	Genetics	Article	1996	#REF!	2	title	abstract	nomenclature
10	PNAS	Immunology	Article	1996	#REF!	2	figure
11	PNAS	Biochemistry	Article	1996	#REF!	2	figure
12	PNAS	Pharmacology	Article	1996	#REF!	2	Value
13	PNAS	Biochemistry	Article	1996	#REF!	3	Figure	result
14	PNAS	Chemistry	Article	1996	#REF!	2	Value	figure
15	PNAS	Biochemistry	Article	1996	#REF!	2	figure
16	PNAS	Genetics	Article	1996	#REF!	1	author
17	PNAS	Biochemistry	Article	1996	#REF!	2	figure
18	PNAS	MEDICAL SCIENCES	Article	1996	#REF!	2	sentence
19	PNAS	Evolution	Article	1996	#REF!	2	Methods
20	PNAS	NEUROBIOLOGY	Article	1996	#REF!	2	figure
21	PNAS	Genetics	Article	1996	#REF!	2	figure
22	PNAS	MEDICAL SCIENCES	Article	1996	#REF!	1	Typo
23	PNAS	NEUROBIOLOGY	Article	1996	#REF!	2	figure
24	PNAS	Immunology	Article	1996	#REF!	1	title
25	PNAS	Ecology	Article	1996	#REF!	2	reference
26	PNAS	Biochemistry	Article	1996	#REF!	3	result	table
27	PNAS	Biochemistry	Article	1996	#REF!	2	genbank
28	PNAS	MEDICAL SCIENCES	Article	1996	#REF!	2	figure
29	PNAS	MEDICAL SCIENCES	Article	1996	#REF!	2	sentence
30	PNAS	MEDICAL SCIENCES	Article	1996	#REF!	3	retraction
1	PNAS	Immunology	Article	1997	#REF!	2	formula
2	PNAS	Immunology	Article	1997	#REF!	2	sentence
3	PNAS	Biochemistry	Article	1997	#REF!	2	Figure
4	PNAS	From the academy	varis	1997	#REF!	2	reference
5	PNAS	Biochemistry	Article	1997	#REF!	1	Word
6	PNAS	Biochemistry	Article	1997	#REF!	1	author
7	PNAS	Statistics	Article	1997	#REF!	2	equation
8	PNAS	MEDICAL SCIENCES	Article	1997	#REF!	1	author
9	PNAS	Chemistry	Article	1997	#REF!	2	sentence
10	PNAS	Immunology	Article	1997	#REF!	2	figure
11	PNAS	Physiology	Article	1997	#REF!	1	author
12	PNAS	Microbiology	Article	1997	#REF!	2	sentence
13	PNAS	Commentary	varis	1997	#REF!	2	figure
14	PNAS	Cell biology	Article	1997	#REF!	2	sequence	figure
15	PNAS	Biochemistry	Article	1997	#REF!	2	table	value
16	PNAS	Biochemistry	Article	1997	#REF!	2	sequence
17	PNAS	Genetics	Article	1997	#REF!	2	Value
18	PNAS	Physiology	Article	1997	#REF!	2	Methods
19	PNAS	Biochemistry	Article	1997	#REF!	2	figure
20	PNAS	NEUROBIOLOGY	Article	1997	#REF!	1	author
21	PNAS	NEUROBIOLOGY	Article	1997	#REF!	1	Typo
22	PNAS	Cell biology	Article	1997	#REF!	1	genbank
23	PNAS	Biochemistry	Article	1997	#REF!	2	figure	table
24	PNAS	MEDICAL SCIENCES	Article	1997	#REF!	3	based on retracted paper
25	PNAS	MEDICAL SCIENCES	Article	1997	#REF!	2	Value	result
26	PNAS	Genetics	Article	1997	#REF!	1	Acknowledgements
27	PNAS	Biochemistry	Article	1997	#REF!	2	figure
28	PNAS	Genetics	Article	1997	#REF!	2	table
29	PNAS	Biochemistry	Article	1997	#REF!	3	retraction
30	PNAS	Genetics	Article	1997	#REF!	2	figure
1	PNAS	Genetics	Article	1998	#REF!	2	figure
2	PNAS	Physiology	Article	1998	#REF!	3	Result
3	PNAS	Evolution	Article	1998	#REF!	2	sentence
4	PNAS	MEDICAL SCIENCES	Article	1998	#REF!	3	Result
5	PNAS	Cell biology	Article	1998	#REF!	3	retraction
6	PNAS	MEDICAL SCIENCES	Article	1998	#REF!	2	sentence
7	PNAS	Evolution	Article	1998	#REF!	2	Value	result
8	PNAS	NEUROBIOLOGY	Article	1998	#REF!	2	figure	acknowledgements
9	PNAS	PLANT BIOLOGY	Article	1998	#REF!	1	title
10	PNAS	NEUROBIOLOGY	Article	1998	#REF!	2	Value
11	PNAS	Applied Biological Sciences	Article	1998	#REF!	3	retraction
12	PNAS	Genetics	Article	1998	#REF!	3	Result
13	PNAS	Psychology	Article	1998	#REF!	2	figure
14	PNAS	Cell biology	Article	1998	#REF!	2	figure
15	PNAS	Physiology	Article	1998	#REF!	3	result	gembank
16	PNAS	Genetics	Article	1998	#REF!	2	figure
17	PNAS	Immunology	Article	1998	#REF!	2	figure
18	PNAS	Agricultural sciences	Article	1998	#REF!	1	author
19	PNAS	MEDICAL SCIENCES	Article	1998	#REF!	3	figure
20	PNAS	Developmental biology	Article	1998	#REF!	1	author
21	PNAS	Immunology	Article	1998	#REF!	2	figure
22	PNAS	PLANT BIOLOGY	Article	1998	#REF!	2	Table
23	PNAS	Genetics	Article	1998	#REF!	1	Acknowledgements
24	PNAS	Evolution	Article	1998	#REF!	2	Table
25	PNAS	Biochemistry	Article	1998	#REF!	3	Result	dna sequencing
26	PNAS	PLANT BIOLOGY	Article	1998	#REF!	2	figure
27	PNAS	Developmental biology	Article	1998	#REF!	2	Result
28	PNAS	NEUROBIOLOGY	Article	1998	#REF!	2	nomenclature	reference
29	PNAS	Applied Biological Sciences	Article	1998	#REF!	2	equation
30	PNAS	Biochemistry	Article	1998	#REF!	2	Result	reference
1	PNAS	Immunology	Article	1999	#REF!	3	Table	sentence
2	PNAS	Immunology	Article	1999	#REF!	1	title
3	PNAS	Psychology	Article	1999	#REF!	2	sentence
4	PNAS	Biochemistry	Article	1999	#REF!	1	reference
5	PNAS	NEUROBIOLOGY	Article	1999	#REF!	3	figure
6	PNAS	Genetics	Article	1999	#REF!	1	author
7	PNAS	NEUROBIOLOGY	Article	1999	#REF!	3	result
8	PNAS	PLANT BIOLOGY	Article	1999	#REF!	2	reference
9	PNAS	Applied Biological Sciences	Article	1999	#REF!	1	Typo
10	PNAS	Biochemistry	Article	1999	#REF!	2	genbank
11	PNAS	Biophysics	Article	1999	#REF!	2	Figure
12	PNAS	Immunology	Article	1999	#REF!	1	reference
13	PNAS	Pharmacology	Article	1999	#REF!	2	compound
14	PNAS	Perspective	Article	1999	#REF!	2	Title	nomenclature
15	PNAS	Microbiology	Article	1999	#REF!	2	figure
16	PNAS	Colloquium paper	varis	1999	#REF!	2	figure
17	PNAS	Biophysics	Article	1999	#REF!	2	Typo
18	PNAS	Cell biology	Article	1999	#REF!	2	Table
19	PNAS	Biophysics	Article	1999	#REF!	2	Typo
20	PNAS	Genetics	Article	1999	#REF!	3	Figure	table
21	PNAS	Microbiology	Article	1999	#REF!	2	Typo
22	PNAS	NEUROBIOLOGY	Article	1999	#REF!	1	author
23	PNAS	MEDICAL SCIENCES	Article	1999	#REF!	2	Figure
24	PNAS	MEDICAL SCIENCES	Article	1999	#REF!	2	Table	result
25	PNAS	MEDICAL SCIENCES	Article	1999	#REF!	3	Equation
26	PNAS	Immunology	Article	1999	#REF!	2	Table
27	PNAS	Population biology	Article	1999	#REF!	2	genbank
28	PNAS	Developmental biology	Article	1999	#REF!	2	Figure
29	PNAS	NEUROBIOLOGY	Article	1999	#REF!	2	Figure	equation
30	PNAS	Perspective	Article	1999	#REF!	1	author
1	PNAS	Genetics	Article	2000	#REF!	3	figure
2	PNAS	Agricultural sciences	Article	2000	#REF!	2	sequence
3	PNAS	Microbiology	Article	2000	#REF!	3	Result
4	PNAS	MEDICAL SCIENCES	Article	2000	#REF!	3	figure
5	PNAS	Evolution	Article	2000	#REF!	1	reference
6	PNAS	MEDICAL SCIENCES	Article	2000	#REF!	1	encabezamiento
7	PNAS	MEDICAL SCIENCES	Article	2000	#REF!	2	reference	reference
8	PNAS	From the academy	varis	2000	#REF!	1	author
9	PNAS	Biochemistry	Article	2000	#REF!	1	figure
10	PNAS	Pharmacology	Article	2000	#REF!	1	encabezamiento
11	PNAS	NEUROBIOLOGY	Article	2000	#REF!	2	result
12	PNAS	NEUROBIOLOGY	Article	2000	#REF!	2	sentence
13	PNAS	Immunology	Article	2000	#REF!	3	Result
14	PNAS	Biochemistry	Article	2000	#REF!	1	Acknowledgements
15	PNAS	Microbiology	Article	2000	#REF!	1	Date
16	PNAS	Microbiology	Article	2000	#REF!	2	Table
17	PNAS	Biochemistry	Article	2000	#REF!	3	Result	figure
18	PNAS	Microbiology	Article	2000	#REF!	2	dna sequence
19	PNAS	Biochemistry	Article	2000	#REF!	1	Acknowledgements
20	PNAS	PLANT BIOLOGY	Article	2000	#REF!	3	Result
21	PNAS	Genetics	Article	2000	#REF!	1	author
22	PNAS	MEDICAL SCIENCES	Article	2000	#REF!	3	Result
23	PNAS	MEDICAL SCIENCES	Article	2000	#REF!	3	Result
24	PNAS	Biophysics	Article	2000	#REF!	2	reference
25	PNAS	Immunology	Article	2000	#REF!	1	author
26	PNAS	Colloquium	varis	2000	#REF!	1	author
27	PNAS	Evolution	Article	2000	#REF!	1	Acknowledgements
28	PNAS	Biophysics	Article	2000	#REF!	3	Equation	sentence	result
29	PNAS	Cell biology	Article	2000	#REF!	2	Result
30	PNAS	Commentary	varis	2000	#REF!	2	nomenclature
31	PNAS	NEUROBIOLOGY	Article	2001	#REF!	1	Typo
32	PNAS	Ecology	Article	2001	#REF!	1	author
33	PNAS	Biochemistry	Article	2001	#REF!	1	Typo
34	PNAS	NEUROBIOLOGY	Article	2001	#REF!	2	author
35	PNAS	Biophysics	Article	2001	#REF!	2	Figure
36	PNAS	Biochemistry	Article	2001	#REF!	3	Reagents	figure	sentence			reference
37	PNAS	NEUROBIOLOGY	Article	2001	#REF!	2	Figure
38	PNAS	MEDICAL SCIENCES	Article	2001	#REF!	2	Figure
39	PNAS	Evolution	Article	2001	#REF!	2	Table
40	PNAS	Genetics	Article	2001	#REF!	1	author
41	PNAS	Genetics	Article	2001	#REF!	3	Sentence	figure	table
42	PNAS	Physiology	Article	2001	#REF!	2	Sentence	reference
43	PNAS	NEUROBIOLOGY	Article	2001	#REF!	2	Figure
44	PNAS	Psychology	Article	2001	#REF!	2	Table
45	PNAS	Ecology	Article	2001	#REF!	1	sentence
46	PNAS	Antropology	Article	2001	#REF!	2	Table	figure
47	PNAS	Chemistry, Genetics	Article	2001	#REF!	1	reference
48	PNAS	Biochemistry	Article	2001	#REF!	2	dna sequence
49	PNAS	Microbiology	Article	2001	#REF!	1	author
50	PNAS	Neurobiology	Article	2001	#REF!	1	footnote
51	PNAS	Immunology	Article	2001	#REF!	1	Typo
52	PNAS	Genetics	Article	2001	#REF!	2	Figure	result
53	PNAS	Microbiology	Article	2001	#REF!	1	reference
54	PNAS	Genetics	Article	2001	#REF!	1	Typo
55	PNAS	Microbiology	Article	2001	#REF!	1	author
56	PNAS	Immunology	Article	2001	#REF!	1	Typo
1	PNAS	CHEMISTRY	Article	2001	#REF!	1	footnote
2	PNAS	PHARMACOLOGY	Article	2001	#REF!	1	footnote
3	PNAS	NEUROBIOLOGY	Article	2001	#REF!	1	footnote
4	PNAS	PLANT BIOLOGY	Article	2001	#REF!	1	footnote
1	PNAS	BIOCHEMISTRY	Article	2002	#REF!	2	figure
2	PNAS	BIOCHEMISTRY	Article	2002	#REF!	1	author
3	PNAS	MEDICAL SCIENCES	Article	2002	#REF!	2	figure
4	PNAS	BIOPHYSICS	Article	2002	#REF!	1	author
5	PNAS	PHYSIOLOGY	Article	2002	#REF!	1	Typo
6	PNAS	NEUROBIOLOGY	Article	2002	#REF!	2	Figure	author
7	PNAS	BIOPHYSICS.	Article	2002	#REF!	2	equation
8	PNAS	APPLIED BIOLOGICAL SCIENCES	Article	2002	#REF!	1	Typo
9	PNAS	BIOCHEMISTRY	Article	2002	#REF!	1	author
10	PNAS	MEDICAL SCIENCES	Article	2002	#REF!	2	formula
11	PNAS	Medical Sciences	Article	2002	#REF!	1	author
12	PNAS	PHYSIOLOGY	Article	2002	#REF!	2	references
13	PNAS	AGRICULTURAL SCIENCES	Article	2002	#REF!	2	Figure
14	PNAS	BIOCHEMISTRY	Article	2002	#REF!	3	Result
15	PNAS	NEUROSCIENC	Article	2002	#REF!	1	Typo
16	PNAS	Biochemistry	Article	2002	#REF!	3	figure
17	PNAS	NEUROSCIENCE	Article	2002	#REF!	1	Typo
18	PNAS	IMMUNOLOGY	Article	2002	#REF!	2	Figure
19	PNAS	Commentaries	varis	2002	#REF!
20	PNAS	CHEMISTRY	Article	2002	#REF!	1	author
21	PNAS	Cell Biology	Article	2002	#REF!	1	author
22	PNAS	BIOCHEMISTRY	Article	2002	#REF!	1	author
23	PNAS	GENETICS	Article	2002	#REF!	2	word	figure
24	PNAS	BIOPHYSICS	Article	2002	#REF!	2	figure
25	PNAS	Plant Biology	Article	2002	#REF!	2	figure
26	PNAS	GENETICS.	Article	2002	#REF!	1	Acknowledgements
27	PNAS	BIOCHEMISTRY	Article	2002	#REF!	3	Result
28	PNAS	CELL BIOLOGY	Article	2002	#REF!	2	Figure
29	PNAS	GENETICS	Article	2002	#REF!	1	author
30	PNAS	COMMENTARY	varis	2002	#REF!
1	PNAS	CELL BIOLOGY	Article	2003	#REF!	1	Acknowledgements
2	PNAS	IMMUNOLOGY	Article	2003	#REF!	1	author
3	PNAS	COMMENTARY	varis	2003	#REF!
4	PNAS	NEUROSCIENCE	Article	2003	#REF!	1	author
5	PNAS	BIOCHEMISTRY	Article	2003	#REF!	2	Figure
6	PNAS	PLANT BIOLOGY	Article	2003	#REF!	2	Word
7	PNAS	BIOPHYSICS, CHEMISTRY	Article	2003	#REF!	2	figure
8	PNAS	MEDICAL SCIENCES.	Article	2003	#REF!	2	Table
9	PNAS	NEUROSCIENCE	Article	2003	#REF!	2	figure
10	PNAS	MEDICAL SCIENCES	Article	2003	#REF!	3	Figure	result	methods
11	PNAS	Biochemistry	Article	2003	#REF!	2	Figure
12	PNAS	BIOCHEMISTRY	Article	2003	#REF!	2	Figure
13	PNAS	MEDICAL SCIENCES	Article	2003	#REF!	1	author
14	PNAS	NEUROSCIENCE	Article	2003	#REF!	2	Word
15	PNAS	EVOLUTION, ANTHROPOLOGY	Article	2003	#REF!	2	Table	reference
16	PNAS	NEUROSCIENCE	Article	2003	#REF!	2	Figure
17	PNAS	Medical Sciences	Article	2003	#REF!	3	Figure
18	PNAS	cell biology	Article	2003	#REF!	1	Typo
19	PNAS	PLANT BIOLOGY.	Article	2003	#REF!	3	Figure
20	PNAS	NEUROSCIENCE	Article	2003	#REF!	1	Reference
21	PNAS	SOCIAL SCIENCES	Article	2003	#REF!	2	Methods
22	PNAS	NEUROSCIENCE	Article	2003	#REF!	2	Figure
23	PNAS	biochemistry, medical sciences	Article	2003	#REF!	3	Result error
24	PNAS	evolution	Article	2003	#REF!	1	author
25	PNAS	special feature, chemistry	varis	2003	#REF!	1	clarification
26	PNAS	evolution.	Article	2003	#REF!	2	figure
27	PNAS	genetics	Article	2003	#REF!	2	Table
28	PNAS	commentary	varis	2003	#REF!
29	PNAS	medical sciences	Article	2003	#REF!	2	Figure
30	PNAS	neuroscience	Article	2003	#REF!	1	Acknowledgements
1	PNAS	MICROBIOLOGY	Article	2004	#REF!	2	methods
2	PNAS	MICROBIOLOGY	Article	2004	#REF!
3	PNAS	Neuroscience	Article	2004	#REF!	2	sentence
4	PNAS	NEUROSCIENCE	Article	2004	#REF!	2	figure
5	PNAS	INAUGURAL ARTICLE, DEVELOPMENTAL BIOLOGY	Article	2004	#REF!	2	clarification
6	PNAS	BIOPHYSICS	Article	2004	#REF!	1	author
7	PNAS	microbiology	Article	2004	#REF!	3	figure
8	PNAS	CELL BIOLOGY	Article	2004	#REF!	2	formula
9	PNAS	MICROBIOLOGY	Article	2004	#REF!	2	sentence
10	PNAS	MEDICAL SCIENCES	Article	2004	#REF!	1	author
11	PNAS	APPLIED BIOLOGICAL SCIENCES	Article	2004	#REF!	1	author
12	PNAS	Medical Sciences	Article	2004	#REF!	2	clarification
13	PNAS	Plant Biology	Article	2004	#REF!	3	Result
14	PNAS	CHEMISTRY, BIOPHYSICS	Article	2004	#REF!	2	equation
15	PNAS	NEUROSCIENCE	Article	2004	#REF!	2	Word
16	PNAS	DEVELOPMENTAL BIOLOGY	Article	2004	#REF!	2	sentence
17	PNAS	Developmental Biology	Article	2004	#REF!	2	figure
18	PNAS	COMMENTARY	varis	2004	#REF!
19	PNAS	PLANT BIOLOGY	Article	2004	#REF!	1	author
20	PNAS	GENETICS	Article	2004	#REF!	2	Word
21	PNAS	Commentaries	varis	2004	#REF!
22	PNAS	GENETICS	Article	2004	#REF!	2	figure
23	PNAS	PLANT BIOLOGY.	Article	2004	#REF!	1	author
24	PNAS	PLANT BIOLOGY	Article	2004	#REF!	3	Fig
25	PNAS	MEDICAL SCIENCES	Article	2004	#REF!	1	author
26	PNAS	MEDICAL SCIENCES.	Article	2004	#REF!	2	code
27	PNAS	PHYSIOLOG	Article	2004	#REF!	1	author
28	PNAS	PHARMACOLOGY	Article	2004	#REF!	1	supported
29	PNAS	PHARMACOLOG	Article	2004	#REF!	1	author
30	PNAS	PHARMACOLOGY.	Article	2004	#REF!	1	author
1	PNAS	PHYSIOLOGY.	Article	2005	#REF!	2	Table
2	PNAS	BIOCHEMISTRY	Article	2005	#REF!	1	Acknowledgements
3	PNAS	Immunology	Article	2005	#REF!	2	clarification
4	PNAS	PHARMACOLOGY.	Article	2005	#REF!	2	figure
5	PNAS	CELL BIOLOGY	Article	2005	#REF!	1	Acknowledgements
6	PNAS	BIOCHEMISTRY	Article	2005	#REF!	3	Result	figure
7	PNAS	BIOCHEMISTRY	Article	2005	#REF!	2	figure
8	PNAS	MEDICAL SCIENCES	Article	2005	#REF!	2	Figure
9	PNAS	biochemistry	Article	2005	#REF!	3	Figure
10	PNAS	biophysics	Article	2005	#REF!	1	author
11	PNAS	neuroscience.	Article	2005	#REF!	1	author
12	PNAS	MEDICAL SCIENCES	Article	2005	#REF!	2	clarification
13	PNAS	BIOPHYSICS	Article	2005	#REF!	1	author
14	PNAS	NEUROSCIENCE	Article	2005	#REF!	2	code
15	PNAS	APPLIED MATHEMATICS	Article	2005	#REF!	2	clarification
16	PNAS	BIOCHEMISTRY	Article	2005	#REF!	1	Acknowledgements
17	PNAS	GENETICS	Article	2005	#REF!
18	PNAS	BIOPHYSICS	Article	2005	#REF!	3	Result
19	PNAS	EVOLUTION	Article	2005	#REF!	3	clarification
20	PNAS	MEDICAL SCIENCES	Article	2005	#REF!	2	sequence
21	PNAS	BIOCHEMISTRY	Article	2005	#REF!	1	footnote
22	PNAS	CELL BIOLOGY	Article	2005	#REF!	2	sentence
23	PNAS	PERSPECTIVE	Article	2005	#REF!	1	reference
24	PNAS	Anthropology	Article	2005	#REF!	2	Figure
25	PNAS	Medical Sciences	Article	2005	#REF!	3	clarification
26	PNAS	GENETICS	Article	2005	#REF!	2	sentence
27	PNAS	ANTHROPOLOGY	Article	2005	#REF!	2	Table
28	PNAS	GENETICS	Article	2005	#REF!	1	clarification
29	PNAS	AGRICULTURAL SCIENCES	Article	2005	#REF!	2	Text	table
30	PNAS	GENETICS	Article	2005	#REF!	1	genbank
1	PNAS	cell biology	Article	2006	#REF!	2	figure
2	PNAS	biophysics, applied mathematics	Article	2006	#REF!	2	formula
3	PNAS	biochemistry	Article	2006	#REF!	2	Figure
4	PNAS	biophysics	Article	2006	#REF!	1	author
5	PNAS	developmental biology	Article	2006	#REF!	2	sentence
6	PNAS	Genetics	Article	2006	#REF!	1	Acknowledgements
7	PNAS	medical sciences	Article	2006	#REF!	2	figure
8	PNAS	inaugural article, genetics	Article	2006	#REF!	1	author
9	PNAS	Biological Sciences	Article	2006	#REF!	1	author
10	PNAS	medical sciences	Article	2006	#REF!	1	author
11	PNAS	neuroscience	Article	2006	#REF!	2	Value
12	PNAS	immunology	Article	2006	#REF!	1	author
13	PNAS	medical sciences	Article	2006	#REF!	1	author
14	PNAS	psychology	Article	2006	#REF!	1	author
15	PNAS	Biochemistry	Article	2006	#REF!	1	link
16	PNAS	MEDICAL SCIENCES	Article	2006	#REF!	1	Conflict of interest
17	PNAS	chemistry	Article	2006	#REF!	2	figure
18	PNAS	cell biology	Article	2006	#REF!	1	author
19	PNAS	plant biology	Article	2006	#REF!	1	author
20	PNAS	medical sciences	Article	2006	#REF!	1	funding
21	PNAS	PHYSICS	Article	2006	#REF!	2	figure
22	PNAS	MEDICAL SCIENCES	Article	2006	#REF!	2	Value
23	PNAS	MEDICAL SCIENCES	Article	2006	#REF!	2	Figure
24	PNAS	MEDICAL SCIENCES	Article	2006	#REF!	2	sentence
25	PNAS	APPLIED MATHEMATICS, POPULATION BIOLOGY	Article	2006	#REF!	2	sentence
26	PNAS	MICROBIOLOGY	Article	2006	#REF!	1	author
27	PNAS	Chemistry	Article	2006	#REF!	2	formula
28	PNAS	BIOCHEMISTRY	Article	2006	#REF!	2	sentence
29	PNAS	BIOPHYSICS.	Article	2006	#REF!	1	author
30	PNAS	MICROBIOLOGY	Article	2006	#REF!	2	Sentence
1	PNAS	BIOCHEMISTRY	Article	2007	#REF!	3	Result	figure
2	PNAS	MEDICAL SCIENCES	Article	2007	#REF!	2	sentence
3	PNAS	BIOCHEMISTRY	Article	2007	#REF!	3	Result	figure
4	PNAS	BIOPHYSICS	Article	2007	#REF!	2	method
5	PNAS	MEDICAL SCIENCES	Article	2007	#REF!	1	author
6	PNAS	PERSPECTIVE	Article	2007	#REF!	2	figure
7	PNAS	MEDICAL SCIENCES	Article	2007	#REF!	1	author
8	PNAS	CELL BIOLOGY	Article	2007	#REF!	2	sentence
9	PNAS	MICROBIOLOGY.	Article	2007	#REF!	2	figure
10	PNAS	BIOCHEMISTRY	Article	2007	#REF!	3	sentence
11	PNAS	BIOCHEMISTRY	Article	2007	#REF!	2	data
12	PNAS	DEVELOPMENTAL BIOLOGY	Article	2007	#REF!	2	figure
13	PNAS	MICROBIOLOGY	Article	2007	#REF!	2	sentence
14	PNAS	BIOCHEMISTRY	Article	2007	#REF!	1	author
15	PNAS	APPLIED PHYSICAL SCIENCES	Article	2007	#REF!	2	figure
16	PNAS	BIOPHYSICS	Article	2007	#REF!	2	figure
17	PNAS	CELL BIOLOGY	Article	2007	#REF!	2	Figure
18	PNAS	MEDICAL SCIENCE	Article	2007	#REF!	1	Acknowledgements
19	PNAS	SUSTAINABILITY SCIENCE	Article	2007	#REF!	1	author
20	PNAS	NEUROSCIENCE	Article	2007	#REF!	2	sentence
21	PNAS	MICROBIOLOGY	Article	2007	#REF!	1	author
22	PNAS	PERSPECTIVE	Article	2007	#REF!	2	Figure
23	PNAS	BIOPHYSICS	Article	2007	#REF!	3	Result	formula
24	PNAS	DEVELOPMENTAL BIOLOGY	Article	2007	#REF!	3	Figure
25	PNAS	BIOPHYSICS	Article	2007	#REF!	3	Table	figure
26	PNAS	EVOLUTION	Article	2007	#REF!	2	Table	clarification
27	PNAS	BIOCHEMISTRY	Article	2007	#REF!	2	Figure
28	PNAS	COMMENTARY	varis	2007	#REF!
29	PNAS	CELL BIOLOGY	Article	2007	#REF!	2	sentence
30	PNAS	ENVIRONMENTAL SCIENCES, GEOLOGY	Article	2007	#REF!	3	sentence
1	PNAS	MEDICAL SCIENCES	Article	2008	#REF!	2	figure	supplementary material
2	PNAS	NEUROSCIENCE	Article	2008	#REF!	2	figure
3	PNAS	CHEMISTRY, BIOPHYSICS.	Article	2008	#REF!	3	Figure	table
4	PNAS	ECOLOGY	Article	2008	#REF!	2	data
5	PNAS	BIOCHEMISTRY	Article	2008	#REF!	2	data
6	PNAS	MICROBIOLOGY	Article	2008	#REF!	2	data
7	PNAS	MEDICAL SCIENCES	Article	2008	#REF!	1	author
8	PNAS	PLANT BIOLOGY	Article	2008	#REF!	2	sentence
9	PNAS	CELL BIOLOGY	Article	2008	#REF!	2	figure
10	PNAS	Cell Biology	Article	2008	#REF!	2	figure
11	PNAS	BIOPHYSICS	Article	2008	#REF!	1	author
12	PNAS	LETTER (ONLINE ONLY)	letter	2008	#REF!	2	sentence
13	PNAS	NEUROSCIENCE	Article	2008	#REF!	1	footnote
14	PNAS	BIOCHEMISTRY	Article	2008	#REF!	3	Figure
15	PNAS	MEDICAL SCIENCES	Article	2008	#REF!	1	Acknowledgements
16	PNAS	COMMENTARY	varis	2008	#REF!
17	PNAS	IMMUNOLOGY	Article	2008	#REF!	1	author
18	PNAS	BIOPHYSICS	Article	2008	#REF!	1	Word
19	PNAS	BIOCHEMISTRY	Article	2008	#REF!	1	reference
20	PNAS	CELL BIOLOGY	Article	2008	#REF!	2	figure
21	PNAS	BIOCHEMISTRY	Article	2008	#REF!	2	Table
22	PNAS	INAUGURAL ARTICLE, APPLIED PHYSICAL SCIENCES	Article	2008	#REF!	1	author
23	PNAS	PSYCHOLOGY	Article	2008	#REF!	1	figure
24	PNAS	IMMUNOLOGY	Article	2008	#REF!	3	figure
25	PNAS	APPLIED BIOLOGICAL SCIENCES	Article	2008	#REF!	2	equation
26	PNAS	BIOPHYSICS, CHEMISTRY	Article	2008	#REF!	1	author
27	PNAS	NEUROSCIENCE	Article	2008	#REF!	2	figure
28	PNAS	APPLIED BIOLOGICAL SCIENCES	Article	2008	#REF!	3	Figure
29	PNAS	BIOCHEMISTRY	Article	2008	#REF!	3	figure
30	PNAS	BIOPHYSICS	Article	2008	#REF!	1	table
1	PNAS	MEDICAL SCIENCES	Article	2009	#REF!	3	Result
2	PNAS	PHYSIOLOGY	Article	2009	#REF!	1	Acknowledgements
3	PNAS	MEDICAL SCIENCES	Article	2009	#REF!	2	reference
4	PNAS	MEDICAL SCIENCES	Article	2009	#REF!	3	figure
5	PNAS	GENETICS	Article	2009	#REF!	2	sentence
6	PNAS	APPLIED BIOLOGICAL SCIENCES, ENGINEERING	Article	2009	#REF!	2	sentence
7	PNAS	NEUROSCIENCE	Article	2009	#REF!	2	Figure
8	PNAS	PHYSIOLOGY	Article	2009	#REF!	2	Figure
9	PNAS	IMMUNOLOGY	Article	2009	#REF!	2	figure
10	PNAS	ENVIRONMENTAL SCIENCES, CHEMISTRY	Article	2009	#REF!	2	equation
11	PNAS		Article	2009	#REF!	2	sentence
12	PNAS	COMMENTARY	varis	2009	#REF!
13	PNAS	NEUROSCIENCE	Article	2009	#REF!	2	Word
14	PNAS	CELL BIOLOGY	Article	2009	#REF!	2	Typo
15	PNAS	NEUROSCIENCE	Article	2009	#REF!	2	Word
16	PNAS	CHEMISTRY	Article	2009	#REF!	2	figure
17	PNAS	MEDICAL SCIENCES	Article	2009	#REF!	1	Conflict of interest
18	PNAS	AGRICULTURAL SCIENCES	Article	2009	#REF!	2	figure
19	PNAS	NEUROSCIENCE	Article	2009	#REF!	2	reference
20	PNAS	EVOLUTION	Article	2009	#REF!	2	clarification
21	PNAS	Biochemistry	Article	2009	#REF!	2	Figure
22	PNAS	GEOPHYSICS	Article	2009	#REF!	1	author
23	PNAS	BIOPHYSICS AND COMPUTATIONAL BIOLOGY	Article	2009	#REF!	2	text
24	PNAS	PHYSICS, BIOPHYSICS AND COMPUTATIONAL BIOLOGY	Article	2009	#REF!	1	author
25	PNAS	BIOPHYSICS AND COMPUTATIONAL BIOLOGY	Article	2009	#REF!	1	Supplementary material
26	PNAS	CELL BIOLOGY	Article	2009	#REF!	3	figure
27	PNAS	CELL BIOLOGY	Article	2009	#REF!	2	figure
28	PNAS	DEVELOPMENTAL BIOLOGY	Article	2009	#REF!	1	author
29	PNAS	DEVELOPMENTAL BIOLOGY	Article	2009	#REF!	1	author
30	PNAS	PHYSICS	Article	2009	#REF!	1	Acknowledgements
1	PNAS	CHEMISTRY, BIOPHYSICS AND COMPUTATIONAL BIOLOGY	Article	2010	#REF!	1	author
2	PNAS	PHYSICS	Article	2010	#REF!	2	figure
3	PNAS	IMMUNOLOGY	Article	2010	#REF!	1	Acknowledgements
4	PNAS	NEUROSCIENCE	Article	2010	#REF!	1	author
5	PNAS	MICROBIOLOGY	Article	2010	#REF!	1	Acknowledgements
6	PNAS	PHYSICS	Article	2010	#REF!	1	author
7	PNAS	ANTHROPOLOGY	Article	2010	#REF!	1	Acknowledgements
8	PNAS	DEVELOPMENTAL BIOLOGY	Article	2010	#REF!	1	Typo
9	PNAS	CELL BIOLOGY	Article	2010	#REF!	1	title
10	PNAS	PLANT BIOLOGY	Article	2010	#REF!	3	Result
11	PNAS	MEDICAL SCIENCES	Article	2010	#REF!	3	Result
12	PNAS	MEDICAL SCIENCES	Article	2010	#REF!	1	author
13	PNAS	GENETICS	Article	2010	#REF!	1	author
14	PNAS	PHARMACOLOGY	Article	2010	#REF!	2	table
15	PNAS	Neuroscience	Article	2010	#REF!	1	author
16	PNAS	BIOPHYSICS AND COMPUTATIONAL BIOLOGY	Article	2010	#REF!	1	Value
17	PNAS	BIOCHEMISTRY	Article	2010	#REF!	1	author
18	PNAS	NEUROSCIENCE	Article	2010	#REF!	3	Result
19	PNAS	MICROBIOLOGY	Article	2010	#REF!	1	funding
20	PNAS	APPLIED BIOLOGICAL SCIENCES	Article	2010	#REF!	1	Conflict of interest
21	PNAS	MICROBIOLOGY	Article	2010	#REF!	1	author
22	PNAS	MEDICAL SCIENCES	Article	2010	#REF!	1	genbank
23	PNAS	CELL BIOLOGY	Article	2010	#REF!	2	Text
24	PNAS	NEUROSCIENCE, CHEMISTRY	Article	2010	#REF!	1	title
25	PNAS	MICROBIOLOGY	Article	2010	#REF!	1	title
26	PNAS	NEUROSCIENCE	Article	2010	#REF!	2	figure
27	PNAS	MICROBIOLOGY	Article	2010	#REF!	1	author
28	PNAS	IMMUNOLOGY	Article	2010	#REF!	1	author
29	PNAS	GENETICS	Article	2010	#REF!	2	text
30	PNAS	CELL BIOLOGY	Article	2010	#REF!	1	author
1	PNAS	MEDICAL SCIENCES	Article	2011	#REF!	3	result
2	PNAS	IMMUNOLOGY	Article	2011	#REF!	1	author
3	PNAS	NEUROSCIENCE	Article	2011	#REF!	2	figure
4	PNAS	MICROBIOLOGY	Article	2011	#REF!	1	Acknowledgements
5	PNAS	ECONOMIC SCIENCES	Article	2011	#REF!	2	clarification
6	PNAS	NEUROSCIENCE	Article	2011	#REF!	2	figure
7	PNAS	ENVIRONMENTAL SCIENCES	Article	2011	#REF!	3	figure
8	PNAS	BIOCHEMISTRY	Article	2011	#REF!	2	figure
9	PNAS	COLLOQUIUM PAPER	varis	2011	#REF!	2	figure
10	PNAS	CELL BIOLOGY	Article	2011	#REF!	1	Acknowledgements
11	PNAS	CELL BIOLOGY	Article	2011	#REF!	2	Figure
12	PNAS	ECONOMIC SCIENCES	Article	2011	#REF!	1	Text
13	PNAS	DEVELOPMENTAL BIOLOGY	Article	2011	#REF!	2	Value
14	PNAS	MICROBIOLOGY	Article	2011	#REF!	1	genbank
15	PNAS	GENETICS	Article	2011	#REF!	2	Figure
16	PNAS	BIOPHYSICS AND COMPUTATIONAL BIOLOGY, CHEMISTRY	Article	2011	#REF!	2	Figure
17	PNAS	PLANT BIOLOGY	Article	2011	#REF!	2	Reference	clarification
18	PNAS	IMMUNOLOGY	Article	2011	#REF!	1	author
19	PNAS	Biological Sciences	Article	2011	#REF!	1	author
20	PNAS	Biological Sciences	Article	2011	#REF!	1	author
21	PNAS	PLANT BIOLOGY	Article	2011	#REF!	1	author
22	PNAS	BIOPHYSICS AND COMPUTATIONAL BIOLOGY	Article	2011	#REF!	1	conflict of interest
23	PNAS	Biological Sciences	Article	2011	#REF!	2	Figure
24	PNAS	Perspective	Article	2011	#REF!	1	reference
25	PNAS	Biological Sciences	Article	2011	#REF!	1	Acknowledgements
26	PNAS	CHEMISTRY	Article	2011	#REF!	3	Result
27	PNAS	CHEMISTRY	Article	2011	#REF!	3	Result
28	PNAS	EVOLUTION	Article	2011	#REF!
29	PNAS	CHEMISTRY	Article	2011	#REF!	1	clarification
30	PNAS	NEUROSCIENCE	Article	2011	#REF!	1	author
1	PNAS	BIOPHYSICS AND COMPUTATIONAL BIOLOGY	Article	2012	#REF!	2	Code
2	PNAS	MEDICAL SCIENCES	Article	2012	#REF!	1	Acknowledgements
3	PNAS	IMMUNOLOGY	Article	2012	#REF!	1	Conflict of interest
4	PNAS	EARTH, ATMOSPHERIC, AND PLANETARY SCIENCES	Article	2012	#REF!	2	Result
5	PNAS	DEVELOPMENTAL BIOLOGY	Article	2012	#REF!	1	link
6	PNAS	APPLIED BIOLOGICAL SCIENCES	Article	2012	#REF!	2	Value
7	PNAS	PHARMACOLOGY	Article	2012	#REF!	1	author
8	PNAS	ECOLOGY	Article	2012	#REF!	3	Figure	result
9	PNAS	CHEMISTRY	Article	2012	#REF!	2	Result
10	PNAS	IMMUNOLOGY	Article	2012	#REF!	1	Acknowledgements
11	PNAS	PHYSIOLOGY	Article	2012	#REF!	1	author
12	PNAS	IMMUNOLOGY	Article	2012	#REF!	1	Acknowledgements
13	PNAS	PHYSIOLOGY	Article	2012	#REF!	1	author
14	PNAS	MEDICAL SCIENCES	Article	2012	#REF!	1	Acknowledgements
15	PNAS	BIOPHYSICS AND COMPUTATIONAL BIOLOGY	Article	2012	#REF!	2	protein name
16	PNAS	ENVIRONMENTAL SCIENCES	Article	2012	#REF!	1	genbank
17	PNAS	DEVELOPMENTAL BIOLOGY	Article	2012	#REF!	2	sentence
18	PNAS	CELL BIOLOGY	Article	2012	#REF!	2	code
19	PNAS	EARTH, ATMOSPHERIC, AND PLANETARY SCIENCES	Article	2012	#REF!	1	author
20	PNAS	NEUROSCIENCE	Article	2012	#REF!	1	author
21	PNAS	APPLIED MATHEMATICS, SYSTEMS BIOLOGY	Article	2012	#REF!	2	Equation
22	PNAS	PLANT BIOLOGY	Article	2012	#REF!	1	Typo
23	PNAS	EVOLUTION	Article	2012	#REF!	2	Result
24	PNAS	PHYSICS	Article	2012	#REF!	2	Figure
25	PNAS	ENVIRONMENTAL SCIENCES	Article	2012	#REF!	1	Date
26	PNAS	MICROBIOLOGY	Article	2012	#REF!
27	PNAS	NEUROSCIENCE	Article	2012	#REF!	1	reference
28	PNAS	MEDICAL SCIENCES	Article	2012	#REF!	3	Result
29	PNAS	NEUROSCIENCE, CHEMISTRY	Article	2012	#REF!	1	title
30	PNAS	SOCIAL SCIENCES	Article	2012	#REF!	1	Acknowledgements
1	PNAS	MICROBIOLOGY	Article	2013	#REF!	2	Result
2	PNAS	REVIEW	Article	2013	#REF!	2	Result
3	PNAS	BIOPHYSICS AND COMPUTATIONAL BIOLOGY	Article	2013	#REF!
4	PNAS	NEUROSCIENCE	Article	2013	#REF!	1	author
5	PNAS	NEUROSCIENCE	Article	2013	#REF!	2	Figure
6	PNAS	NEUROSCIENCE	Article	2013	#REF!	1	author
7	PNAS	NEUROSCIENCE	Article	2013	#REF!	2	Figure
8	PNAS	IMMUNOLOGY	Article	2013	#REF!	2	Figure
9	PNAS	ENVIRONMENTAL SCIENCES	Article	2013	#REF!	1	Conflict of interest
10	PNAS	PERSPECTIVE	Article	2013	#REF!	2	Result
11	PNAS	PHYSIOLOGY	Article	2013	#REF!	1	conflict of interest
12	PNAS	BIOCHEMISTRY	Article	2013	#REF!	2	reference
13	PNAS	MICROBIOLOGY	Article	2013	#REF!	1	author
14	PNAS	BIOPHYSICS AND COMPUTATIONAL BIOLOGY	Article	2013	#REF!	2	Figure
15	PNAS	NEUROSCIENCE	Article	2013	#REF!	2	Figure
16	PNAS	EARTH, ATMOSPHERIC, AND PLANETARY SCIENCES	Article	2013	#REF!	3	Figure	result
17	PNAS	DEVELOPMENTAL BIOLOGY	Article	2013	#REF!	2	reference
18	PNAS	MATHEMATICS	Article	2013	#REF!	2	sentence
19	PNAS	IMMUNOLOGY	Article	2013	#REF!	1	author
20	PNAS	BIOPHYSICS AND COMPUTATIONAL BIOLOGY	Article	2013	#REF!	1	Acknowledgements
21	PNAS	ASTRONOMY	Article	2013	#REF!	2	Addenda
22	PNAS	NEUROSCIENCE	Article	2013	#REF!	2	Figure
23	PNAS	PLANT BIOLOGY	Article	2013	#REF!	2	Table
24	PNAS	BIOPHYSICS AND COMPUTATIONAL BIOLOGY	Article	2013	#REF!	1	author
25	PNAS	DEVELOPMENTAL BIOLOGY	Article	2013	#REF!	1	Acknowledgements
26	PNAS	Biological Sciences Biochemistry	Article	2013	#REF!	2	Figure
27	PNAS	MEDICAL SCIENCES	Article	2013	#REF!	3	Result
28	PNAS	Biological Sciences - Microbiology	Article	2013	#REF!	1	author
29	PNAS	Suistainability Science	Article	2013	#REF!	2	Table	result
30	PNAS	Environmental Sciences	Article	2013	#REF!	1	Value
1	PNAS	SYSTEMS BIOLOGY	Article	2014	#REF!	3	Result
2	PNAS	CELL BIOLOGY	Article	2014	#REF!	1	author
3	PNAS	MEDICAL SCIENCES	Article	2014	#REF!	2	figure
4	PNAS	PHARMACOLOGY	Article	2014	#REF!	1	author
5	PNAS	PHYSIOLOGY	Article	2014	#REF!	1	author
6	PNAS	NEUROSCIENCE	Article	2014	#REF!	1	Acknowledgements
7	PNAS	BIOCHEMISTRY	Article	2014	#REF!	2	figure
8	PNAS	NEUROSCIENCE	Article	2014	#REF!	3	Value	figure
9	PNAS	MICROBIOLOGY	Article	2014	#REF!	2	figure
10	PNAS	MICROBIOLOGY	Article	2014	#REF!	1	Acknowledgements
11	PNAS	EVOLUTION	Article	2014	#REF!	2	figure
12	PNAS		Article	2014	#REF!	3	Table
13	PNAS	EVOLUTION	Article	2014	#REF!	2	figure
14	PNAS	MEDICAL SCIENCES	Article	2014	#REF!	2	clarification
15	PNAS	MEDICAL SCIENCES	Article	2014	#REF!	2	figure
16	PNAS	MEDICAL SCIENCES	Article	2014	#REF!	3	Figure	supplementary material
17	PNAS	GENETICS	Article	2014	#REF!	1	author
18	PNAS	CHEMISTRY	Article	2014	#REF!	2	figure
19	PNAS	BIOCHEMISTRY	Article	2014	#REF!	1	link
20	PNAS	BIOPHYSICS AND COMPUTATIONAL BIOLOGY	Article	2014	#REF!	1	Acknowledgements
21	PNAS	PHYSIOLOGY	Article	2014	#REF!	1	Typo
22	PNAS	MICROBIOLOGY	Article	2014	#REF!	1	sentence
23	PNAS	CELL BIOLOGY	Article	2014	#REF!	1	author
24	PNAS	CELL BIOLOGY	Article	2014	#REF!	1	title
25	PNAS	ECOLOGY	Article	2014	#REF!	1	Word
26	PNAS	OPINION	varis	2014	#REF!
27	PNAS	Biological Sciences	Article	2014	#REF!	2	Figure
28	PNAS	NEUROSCIENCE	Article	2014	#REF!	1	footnote
29	PNAS	ECOLOGY, ENVIRONMENTAL SCIENCES	Article	2014	#REF!	1	Typo
30	PNAS	IMMUNOLOGY	Article	2014	#REF!	1	author
